# Supplementary material for: Development of two novel natural calcite reference materials for enhanced in situ elemental and Sr isotopic analysis
Source: Royal Society of Chemistry journal article supplement (doi:10.1039/d4ja00003j), 2024-01-01
Supplement: d4ja00003j1.xlsx [file d4ja00003j1.xlsx]

## Sheet: Supplementary Table S1
Table S1 Instrumental settings
Mass spectrometry parameters for in-situ element analysis				Mass spectrometry parameters for Sr isotope analysis
Instrument	ElementXR			Instrument	Neptune Plus
RF forward power	1350 W			RF forward power	1200 W
Auxiliary gas (Ar) flow rate	0.85 L min−1 (optimized daily)			Auxiliary gas (Ar) flow rate	0.98 L min-1 (optimized daily)
Sample gas (Ar) flow rate	0.95 L min−1 (optimized daily)			Sample gas(Ar) flow rate	0.975 L min-1 (optimized daily)
Cooling gas (Ar) flow rate	16.00 L min−1			Cooling gas(Ar) flow rate	16.00 L min-1
Sample cones	H cone Ni			Measurement mode	Static
Skimmer cones	H cone Ni			Interface cones	H sample cone + X skimmer cone
Mass resolution	low mode			Acceleration voltage	10 kV
Integration time	4.19 s in solution mode			Detection system	Seven Faraday cups
Oxide molecular	238U16O/238U<0.3%			Integration time	0.262 s in laser mode
Laser ablation system for element analysis				Laser ablation system for element analysis
Instrument	RESOlutin M-50			Instrument	RESOlutin M-50
wavelength	UV 193 nm (ArF excimer)			wavelength	UV 193 nm (ArF excimer)
Energy density	4J/cm 2			Energy density	4J/cm 2
ablation type	spot			ablation type	spot
Spot size	90 µm for BZS;60 µm forWS-1			Spot size	155 µm for BZS;112 µm forWS-1
Carrier gas	Helium 800 ml/min			Carrier gas	Helium 800 ml/min
Pulse rate	6 Hz			Pulse rate	7Hz
Ablation time	30s			Ablation time	30s
Gas blank time	20s			Gas blank time	30s

## Sheet: SupplementaryTable S2
Table S2 In-situSr isotope values of samples by LA-MC-ICP-MS
		blank	blank	signal	signal
	Sample name	83Kr	88Sr	88Sr	85Rb	87Sr/86Sr	SE	87Rb/86Sr	SE	84Sr/86Sr	SE
Session1	WS-1-1	0.0012887	0.00163693	1.67564	3.75141e-06	0.708691	5.31374e-05	4.5001e-06	0.000358491	0.0564233	1.43858e-05
	WS-1-2	0.00128037	0.0017226	1.7061	4.55279e-07	0.708692	7.09774e-05	5.36389e-07	0.000702987	0.0564609	1.42796e-05
	WS-1-3	0.00128704	0.00175209	1.64464	6.14038e-06	0.708653	6.57655e-05	7.50466e-06	0.00048869	0.0564622	1.52398e-05
	WS-1-4	0.00127534	0.00177234	1.66906	4.19309e-06	0.708654	6.05876e-05	5.04974e-06	0.000428337	0.0564646	1.4045e-05
	WS-1-5	0.00127175	0.00181027	1.8122	3.22129e-06	0.708679	5.82999e-05	3.57298e-06	0.000725298	0.0565075	1.38896e-05
	WS-1-6	0.00128831	0.00182594	1.79406	3.47538e-06	0.708699	5.84007e-05	3.89378e-06	0.000664138	0.0564581	1.29674e-05
	WS-1-7	0.0012665	0.00182503	1.61997	7.29724e-06	0.708749	6.6103e-05	9.05439e-06	0.0005946	0.0565073	1.44921e-05
	WS-1-8	0.00127728	0.00186755	1.67456	7.95259e-06	0.708765	5.0177e-05	9.54583e-06	0.000591055	0.0564883	1.36661e-05
	WS-1-9	0.00129968	0.00188025	1.69326	1.2769e-06	0.708694	6.42155e-05	1.51579e-06	0.000725885	0.0564281	1.36985e-05
	WS-1-10	0.00128338	0.00195036	1.59071	6.41018e-07	0.708667	5.78408e-05	8.10002e-07	0.000415932	0.0564578	1.77662e-05
	WS-1-11	0.00127986	0.00194471	1.6782	4.92859e-06	0.708654	6.14842e-05	5.90317e-06	0.000521744	0.0564701	1.32127e-05
	WS-1-12	0.00127656	0.00195245	1.66013	1.18145e-06	0.708703	6.24194e-05	1.43047e-06	0.00048673	0.0565053	1.5428e-05
	WS-1-13	0.00128427	0.0019776	1.80494	4.70795e-06	0.708678	6.06634e-05	5.24294e-06	0.000625981	0.0564327	1.34732e-05
	WS-1-14	0.00127366	0.00197146	1.70216	6.82894e-06	0.708756	6.06634e-05	8.06417e-06	0.000794144	0.0564877	1.48963e-05
	WS-1-15	0.00127321	0.00200769	1.77067	7.34735e-06	0.708735	6.2837e-05	8.34068e-06	0.000503737	0.0564689	1.31926e-05
Session2	WS-1-1	0.00126026	0.000847151	2.65046	7.54894e-07	0.708766	4.96327e-05	5.72496e-07	0.000618567	0.0564904	9.06708e-06
	WS-1-2	0.00125119	0.00105855	2.78593	1.11886e-05	0.708775	4.77405e-05	8.07258e-06	0.000677119	0.0565166	8.82311e-06
	WS-1-3	0.00126272	0.00120988	2.7638	1.09863e-05	0.708665	4.59014e-05	7.99012e-06	0.000766693	0.0564862	9.52167e-06
	WS-1-4	0.00127276	0.00138444	2.78886	4.60413e-06	0.708765	4.59376e-05	3.31839e-06	0.000736318	0.0565004	8.74579e-06
	WS-1-5	0.00128091	0.00147701	2.88425	2.3242e-06	0.708712	4.8543e-05	1.61975e-06	0.000854239	0.0564755	8.32929e-06
	WS-1-6	0.0013196	0.0016578	2.8518	2.30846e-06	0.70873	4.81116e-05	1.62708e-06	0.000374378	0.0564668	8.71867e-06
	WS-1-7	0.00134769	0.00172074	2.71597	1.63845e-06	0.708695	5.01073e-05	1.2126e-06	0.000912866	0.0564504	9.61614e-06
	WS-1-8	0.00134939	0.00133956	2.83517	1.01864e-05	0.708733	5.12986e-05	7.22183e-06	0.000680183	0.0564631	8.09214e-06
	WS-1-9	0.00133802	0.00148184	2.93038	1.13515e-05	0.708725	4.12159e-05	7.7864e-06	0.000675644	0.0564724	9.41231e-06
	WS-1-10	0.00134417	0.000836534	2.68545	1.26695e-05	0.708763	4.70533e-05	9.4831e-06	0.000757489	0.0564834	8.73812e-06
	WS-1-11	0.00137101	0.00106064	2.79159	9.44546e-06	0.70868	5.44046e-05	6.80109e-06	0.000738448	0.0564478	9.1583e-06
	WS-1-12	0.00137398	0.00123071	2.86804	1.16812e-05	0.708707	4.42754e-05	8.1867e-06	0.000838503	0.0564718	8.38038e-06
	WS-1-13	0.00139505	0.00137372	2.90992	1.30755e-05	0.708766	4.51608e-05	9.03202e-06	0.000614593	0.0564481	8.27018e-06
	WS-1-14	0.00140239	0.00149149	2.85529	9.58612e-06	0.708737	4.36772e-05	6.74838e-06	0.000700251	0.0564476	8.02744e-06
	WS-1-15	0.00139573	0.0016124	2.94938	8.46353e-06	0.708732	5.00666e-05	5.76804e-06	0.000651776	0.0564426	9.69521e-06
	WS-1-16	0.00140138	0.00168918	2.84682	2.87592e-06	0.7088	4.66745e-05	2.0306e-06	0.000564455	0.0564678	9.44003e-06
	WS-1-17	0.00140632	0.00178242	2.58634	2.85845e-06	0.708789	4.3651e-05	2.22153e-06	0.00067793	0.0564717	1.00535e-05
	WS-1-18	0.00141773	0.00183503	2.54585	1.149e-05	0.708787	7.49582e-05	9.07183e-06	0.000260896	0.0564686	1.10259e-05
	WS-1-19	0.00141239	0.00188463	2.55631	1.26991e-05	0.708734	4.15013e-05	9.98544e-06	0.000619717	0.0564527	1.07375e-05
	WS-1-20	0.00140764	0.001944	2.6012	1.16413e-05	0.708779	4.58318e-05	8.99569e-06	0.000591783	0.0564542	1.07608e-05
	WS-1-21	0.001411	0.00198327	2.67508	1.31723e-05	0.708719	4.35202e-05	9.89764e-06	0.000904124	0.0564557	1.03512e-05
	WS-1-22	0.00139543	0.00119307	3.02928	1.31312e-05	0.70873	4.38289e-05	8.71306e-06	0.000535423	0.0564348	8.64395e-06
	WS-1-23	0.00140079	0.00146218	2.74151	7.59541e-06	0.708705	4.59811e-05	5.56888e-06	0.000924845	0.0564349	9.35397e-06
	WS-1-24	0.00140109	0.00156486	2.9973	6.36675e-06	0.70877	4.64694e-05	4.26967e-06	0.000720785	0.0564376	9.1118e-06
	WS-1-25	0.00138757	0.00168134	3.07384	8.80443e-06	0.708748	4.18469e-05	5.75741e-06	0.000490801	0.0564687	7.97797e-06
	WS-1-26	0.0013499	0.00119023	2.72826	1.33755e-05	0.708761	4.99966e-05	9.85445e-06	0.000607956	0.0564558	9.93745e-06
	WS-1-27	0.0013467	0.00139792	2.62861	4.01774e-06	0.70876	4.46107e-05	3.07229e-06	0.000583872	0.0564797	9.10568e-06
	WS-1-28	0.00133529	0.00151224	2.63468	8.34433e-06	0.708728	4.5213e-05	6.36606e-06	0.000811691	0.0564834	8.56084e-06
	WS-1-29	0.0013433	0.00162653	2.69138	1.04953e-05	0.708724	5.13418e-05	7.83836e-06	0.000724268	0.0564698	8.55268e-06
	WS-1-30	0.00135956	0.00174027	3.08974	2.10061e-06	0.708747	4.57804e-05	1.36657e-06	0.000682166	0.0564649	8.02797e-06
	WS-1-31	0.00128632	0.00101497	2.93078	3.77357e-06	0.708736	5.46969e-05	2.58807e-06	0.000683248	0.0564625	8.159e-06
	WS-1-32	0.00129813	0.00122202	2.87833	5.82912e-06	0.708716	4.72482e-05	4.0707e-06	0.000758862	0.0564569	7.5144e-06
	WS-1-33	0.00132746	0.0013857	2.87211	2.36436e-06	0.708804	4.72202e-05	1.65471e-06	0.00076231	0.0564556	8.67858e-06
	WS-1-34	0.00133558	0.00149515	2.59485	9.52263e-07	0.708759	5.2718e-05	7.37651e-07	0.000866335	0.0564538	9.85565e-06
	WS-1-35	0.00134351	0.00157946	2.93923	1.97275e-06	0.708714	5.46113e-05	1.3491e-06	0.000854142	0.05646	9.03617e-06
	WS-1-36	0.00135739	0.000822225	2.60437	1.30667e-06	0.7088	5.47499e-05	1.00848e-06	0.000750095	0.0564158	9.83382e-06
	WS-1-37	0.00135587	0.00104816	2.80529	1.09041e-05	0.70878	5.2378e-05	7.813e-06	0.000873008	0.0564354	7.36767e-06
	WS-1-38	0.00135747	0.0012498	2.54546	1.99225e-07	0.708715	4.55224e-05	1.5732e-07	0.000760377	0.0564363	1.06605e-05
	WS-1-39	0.00134268	0.0013699	2.58617	6.53509e-06	0.708721	4.49587e-05	5.07927e-06	0.000824165	0.0564591	9.41741e-06
	WS-1-40	0.00134768	0.00149763	2.60197	1.09064e-05	0.70875	4.77371e-05	8.42529e-06	0.000660434	0.0564439	1.08983e-05
Session3	WS-1-1	0.00136785	0.00241037	3.01121	1.42849e-05	0.708699	4.35138e-05	9.53547e-06	0.000614656	0.0564293	9.78242e-06
	WS-1-2	0.001504	0.00190451	3.08576	7.07121e-06	0.708718	4.5675e-05	4.60615e-06	0.00076095	0.0564102	8.42093e-06
	WS-1-3	0.00140053	0.00202212	3.02936	2.07835e-06	0.70876	4.41519e-05	1.37903e-06	0.000669135	0.0564254	8.23595e-06
	WS-1-4	0.00138165	0.00212259	3.12631	1.14443e-05	0.708721	3.74246e-05	7.35806e-06	0.000629241	0.0564081	7.02066e-06
	WS-1-5	0.00136723	0.00219656	3.00676	7.90745e-06	0.708725	3.82438e-05	5.28622e-06	0.000594978	0.0564434	8.80913e-06
	WS-1-6	0.00132652	0.00237239	3.06742	4.59715e-06	0.708725	3.98306e-05	3.01247e-06	0.000710728	0.0564291	8.28319e-06
	WS-1-7	0.00134146	0.00103143	2.55265	1.05317e-06	0.70869	4.69331e-05	8.29304e-07	0.000615356	0.0564247	1.07262e-05
	WS-1-8	0.00135082	0.00124889	2.62164	8.48852e-06	0.708749	4.96505e-05	6.50828e-06	0.000678757	0.0564229	9.54803e-06
	WS-1-9	0.00133642	0.00144056	2.53609	5.85376e-06	0.708697	4.39108e-05	4.63957e-06	0.000526893	0.0564345	1.241e-05
	WS-1-10	0.00137078	0.00157393	2.90251	9.3331e-06	0.70874	4.7967e-05	6.46337e-06	0.000548069	0.0563817	9.04258e-06
	WS-1-11	0.00134668	0.00169758	2.72483	1.35931e-05	0.708745	4.46614e-05	1.00274e-05	0.000499969	0.0564301	9.4279e-06
	WS-1-12	0.00132292	0.000979589	2.89464	2.95545e-07	0.708778	4.06355e-05	2.05228e-07	0.000637006	0.0564478	9.83555e-06
	WS-1-13	0.00135649	0.00129282	2.96289	5.75029e-06	0.708744	4.17699e-05	3.90104e-06	0.000647449	0.0564219	9.03885e-06
	WS-1-14	0.00135908	0.00144037	2.99542	1.07717e-05	0.708789	3.42598e-05	7.22826e-06	0.000631121	0.056405	8.80567e-06
	WS-1-15	0.00138155	0.0015924	3.03355	5.46364e-06	0.708752	3.99667e-05	3.62024e-06	0.000752769	0.0563849	8.95804e-06
	WS-1-16	0.00136816	0.00174737	2.93728	1.45044e-05	0.708748	4.5157e-05	9.92573e-06	0.000659479	0.0564205	8.28361e-06
	WS-1-17	0.00137255	0.00183537	2.95724	4.62636e-06	0.708767	4.21916e-05	3.14456e-06	0.000730071	0.0564017	7.57518e-06
	WS-1-18	0.00136356	0.00188695	2.92488	4.50809e-07	0.708757	4.40461e-05	3.09807e-07	0.000637569	0.0564117	8.63398e-06
	WS-1-19	0.00137637	0.00199327	3.19354	4.55965e-06	0.708715	4.23142e-05	2.8699e-06	0.000766573	0.056388	8.31647e-06
	WS-1-20	0.00138361	0.00205871	2.91491	9.13877e-06	0.708695	4.4622e-05	6.30186e-06	0.0005923	0.056502	2.26277e-05
	WS-1-21	0.00131114	0.00169402	2.21776	5.86564e-06	0.70874	5.40546e-05	5.31629e-06	0.000551349	0.0564721	1.2798e-05
	WS-1-22	0.00131061	0.00174412	2.20446	9.16135e-06	0.708688	5.35664e-05	8.35341e-06	0.000620563	0.0564705	1.14101e-05
	WS-1-23	0.00132141	0.00181389	2.2175	4.02875e-06	0.708714	6.09473e-05	3.65186e-06	0.000461826	0.056487	1.22655e-05
	WS-1-24	0.00133317	0.00185223	2.21782	2.52822e-06	0.708702	5.26682e-05	2.29137e-06	0.000705675	0.0564485	1.16986e-05
Session4	WS-1-1		0.00162762	2.0202	4.02754e-06	0.708675	5.82399e-05	3.11217e-06	0.000628537	0.0564864	1.38558e-05
	WS-1-2		0.00169375	2.03723	5.22437e-06	0.708691	5.77291e-05	5.57541e-06	0.000582251	0.0564142	1.23994e-05
	WS-1-3		0.00173393	2.07115	2.56625e-06	0.70869	5.71833e-05	2.69999e-06	0.000589769	0.0565255	1.26008e-05
	WS-1-4		0.00181522	2.15632	3.41257e-06	0.708696	5.56916e-05	3.481e-06	0.000575219	0.0563898	1.20271e-05
	WS-1-5		0.00183938	2.07073	3.98093e-06	0.708716	5.63904e-05	4.39018e-06	0.000790383	0.056482	1.24933e-05
	WS-1-6		0.00172409	2.07527	8.27699e-06	0.708644	6.00796e-05	8.20563e-06	0.00059284	0.0565302	1.19256e-05
	WS-1-7		0.00167469	2.30247	9.65205e-06	0.708745	4.56965e-05	8.66612e-06	0.00063335	0.0564389	1.15392e-05
	WS-1-8		0.00118798	2.34305	4.90044e-06	0.708741	5.36338e-05	3.85713e-06	0.000700647	0.0565769	1.05012e-05
	WS-1-9		0.00135652	2.38941	7.09168e-06	0.708707	6.93272e-05	5.22789e-06	0.0006105	0.056487	1.19159e-05
	WS-1-10		0.00146176	2.43668	9.19871e-06	0.708675	6.57198e-05	7.36e-06	0.00070898	0.0565546	1.03716e-05
	WS-1-11		0.0015702	2.45297	6.28703e-06	0.708745	6.65244e-05	4.59363e-06	0.000612547	0.0564019	1.08147e-05
	WS-1-12		0.0016487	2.51483	5.53942e-06	0.708709	6.62496e-05	4.53702e-06	0.000726824	0.0564762	9.9433e-06
	WS-1-13		0.00174722	2.50111	5.86698e-06	0.708739	6.88313e-05	5.1531e-06	0.000606766	0.0564028	1.11034e-05
	WS-1-14		0.00180587	2.44449	3.95391e-06	0.708743	6.91681e-05	3.86129e-06	0.000660353	0.0565519	1.07496e-05
	WS-1-15		0.00156099	2.71076	6.52241e-06	0.708761	6.17173e-05	4.72168e-06	0.000679057	0.0565403	9.07282e-06
	WS-1-16		0.00138801	2.25896	7.86548e-06	0.708759	7.18496e-05	5.81024e-06	0.000518369	0.0563667	9.83508e-06
	WS-1-17		0.0012599	2.25741	1.21858e-05	0.708757	5.90612e-05	9.18037e-06	0.000684775	0.0564899	9.43291e-06
	WS-1-18		0.00140484	2.22991	1.0691e-05	0.70878	6.33264e-05	7.92897e-06	0.000698975	0.0565329	9.81359e-06
	WS-1-19		0.0015328	2.26572	9.81921e-06	0.708731	5.79511e-05	7.13424e-06	0.000826315	0.0566286	9.15911e-06
	WS-1-20		0.00134793	2.31444	9.51029e-06	0.708736	5.95975e-05	6.45494e-06	0.000668085	0.0564441	8.41447e-06
	WS-1-21		0.00153715	2.45096	6.49666e-06	0.708724	5.97003e-05	4.64811e-06	0.000666492	0.0564254	8.70003e-06
	WS-1-22		0.00163267	2.34684	5.48958e-06	0.708732	6.35454e-05	3.7501e-06	0.000761809	0.0564771	9.47438e-06
	WS-1-23		0.00157002	2.40629	7.28891e-06	0.70876	6.05887e-05	5.00328e-06	0.00057848	0.0564091	8.50338e-06
	WS-1-24		0.00148483	2.43218	9.19516e-06	0.708758	5.84408e-05	6.62079e-06	0.000653844	0.0565713	9.80109e-06
	WS-1-25		0.00135649	2.29027	9.39244e-06	0.70877	7.2203e-05	7.20907e-06	0.000534085	0.0564795	9.62322e-06
	WS-1-26		0.00148584	2.18331	1.0163e-05	0.708714	6.11515e-05	7.71753e-06	0.000723285	0.0565152	9.48555e-06
	WS-1-27		0.00160041	2.21738	1.12726e-05	0.708657	6.12945e-05	8.34025e-06	0.000718184	0.0564243	9.23129e-06
	WS-1-28		0.00169909	2.26684	9.44947e-06	0.708744	5.82666e-05	6.76541e-06	0.000733628	0.0563955	8.8831e-06
	WS-1-29		0.00123317	2.40965	8.83029e-06	0.708734	6.16213e-05	6.0165e-06	0.000639641	0.056433	8.2768e-06
	WS-1-30		0.0014322	2.44871	7.29602e-06	0.708632	6.20949e-05	5.13587e-06	0.000778494	0.0564629	8.85452e-06
	WS-1-31		0.00154658	2.38034	3.86901e-06	0.708682	6.08244e-05	2.65166e-06	0.000682517	0.0565877	9.0768e-06
	WS-1-32		0.00165297	2.42118	4.20505e-06	0.708765	5.98936e-05	2.90553e-06	0.000678355	0.056579	9.29571e-06
	WS-1-33		0.0015349	2.29306	8.94611e-06	0.708754	7.7812e-05	6.75846e-06	0.000574331	0.0564989	9.99983e-06
	WS-1-34		0.00136826	2.28148	6.00785e-06	0.708764	6.10402e-05	4.68874e-06	0.000651228	0.0565108	9.89234e-06
	WS-1-35		0.00150147	2.16369	1.02966e-05	0.708669	6.21498e-05	7.72492e-06	0.000758827	0.0563639	8.89644e-06
	WS-1-36		0.00161986	2.23366	7.95559e-06	0.70872	6.08333e-05	5.96444e-06	0.000796256	0.0565094	9.85478e-06
	WS-1-37		0.00143441	2.19775	7.25562e-06	0.708653	5.83128e-05	5.05296e-06	0.000680585	0.0565536	8.69644e-06
	WS-1-38		0.00132493	2.41811	7.42512e-06	0.70873	6.43132e-05	5.52741e-06	0.000756176	0.0565014	9.47043e-06
	WS-1-39		0.00139344	2.29841	6.09794e-06	0.708743	6.09164e-05	4.17019e-06	0.000739824	0.0565458	8.3131e-06
	WS-1-40		0.0018258	2.44818	8.48455e-06	0.70865	5.74517e-05	5.6492e-06	0.000622589	0.0563629	8.81299e-06
	WS-1-41		0.00152996	2.4881	7.133e-06	0.708746	6.43022e-05	5.06609e-06	0.00074508	0.0564497	9.40468e-06
	WS-1-42		0.0016665	2.3358	2.68961e-06	0.708745	6.21287e-05	1.93347e-06	0.000702383	0.0564634	8.7926e-06
	WS-1-43		0.00148568	2.38811	7.03176e-06	0.70865	5.95346e-05	4.91087e-06	0.000730342	0.0564687	8.47177e-06
	WS-1-44		0.00162375	2.32371	9.76892e-06	0.708743	6.15175e-05	6.97919e-06	0.000730751	0.0564032	8.24316e-06
	WS-1-45		0.00178749	2.36206	2.299e-06	0.708729	5.68245e-05	1.51212e-06	0.000717757	0.0564573	8.99056e-06
	WS-1-46		0.00113876	2.41739	3.78728e-06	0.708646	6.35218e-05	2.83222e-06	0.00070759	0.056398	9.4342e-06
	WS-1-47		0.00132285	2.24156	8.408e-06	0.708738	6.26755e-05	6.33476e-06	0.000699351	0.0564816	9.32025e-06
	WS-1-48		0.00141313	2.25054	4.10906e-06	0.708675	5.92352e-05	3.14714e-06	0.000644602	0.056553	1.05443e-05
	WS-1-49		0.00182648	2.25341	8.19008e-06	0.708733	6.24862e-05	5.57883e-06	0.000676353	0.0565047	9.56022e-06
	WS-1-50		0.00172718	2.36349	7.54568e-06	0.708725	6.28107e-05	5.32754e-06	0.00070502	0.0564427	8.96167e-06
	WS-1-51		0.00127464	2.4305	1.22685e-06	0.708779	6.04662e-05	8.64248e-07	0.000685412	0.0563873	9.30177e-06
	WS-1-52		0.00148786	2.36899	9.36621e-06	0.708748	5.70147e-05	6.35737e-06	0.000716566	0.0565067	7.80906e-06
	WS-1-53		0.00162891	2.47069	6.2928e-06	0.708743	5.11446e-05	4.22393e-06	0.000662159	0.056526	9.42511e-06
	WS-1-54		0.00177823	2.37435	5.53196e-06	0.708733	5.40609e-05	3.90399e-06	0.000762554	0.0564879	8.88621e-06
	WS-1-55		0.00142548	2.4131	8.82132e-06	0.708729	6.05918e-05	6.39344e-06	0.00064509	0.0563342	9.96938e-06
	WS-1-56		0.00154213	2.24775	6.55744e-06	0.708643	5.96974e-05	4.82642e-06	0.000704414	0.0563875	8.5616e-06
	WS-1-57		0.00191263	2.32453	6.86314e-06	0.708718	5.69706e-05	4.82828e-06	0.000593039	0.056512	1.02755e-05
Session5	WS-1-1	0.00201824	2.09448e-05	2.96862	8.0624e-05	0.708684	4.75805e-05	2.73489e-05	7.88651e-06	0.0567325	2.70254e-05
	WS-1-2	0.00264741	0.000164278	1.40553	5.60783e-07	0.70872	8.06969e-05	1.53367e-05	1.62484e-05	0.0566448	5.64335e-05
	WS-1-3	0.00152728	0.00157985	2.24112	8.10833e-05	0.7087	4.40814e-05	0.00013854	1.00412e-05	0.0568832	3.45363e-05
	WS-1-4	0.00153039	0.000223775	2.2195	5.67691e-05	0.708638	4.98183e-05	9.77695e-05	2.03676e-05	0.0557735	0.000416118
	WS-1-5	0.00157481	0.00383062	2.22893	0.000161951	0.708701	4.79085e-05	0.000237156	0.000130331	0.0563042	2.91835e-05
	WS-1-6	0.00158501	0.000127849	2.13098	6.21734e-06	0.708688	5.52909e-05	9.40235e-06	1.08777e-05	0.0562214	3.24569e-05
	WS-1-7	0.00159801	0.000192498	2.14598	9.42225e-05	0.70869	4.85389e-05	0.000132805	1.14271e-05	0.0569172	4.02899e-05
	WS-1-8	0.00157405	0.000169209	2.22123	2.94093e-06	0.708723	4.42548e-05	1.87054e-05	1.09544e-05	0.0564702	3.15202e-05
	WS-1-9	0.0015917	0.000242139	2.17009	1.28062e-05	0.708657	4.89786e-05	4.41835e-05	9.71382e-06	0.0564606	2.91037e-05
	WS-1-10	0.00162138	0.000202438	2.20719	8.2846e-05	0.708697	5.18386e-05	0.000162906	1.69495e-05	0.0564966	3.013e-05
	WS-1-11	0.00161509	0.000190015	2.09509	0.000185231	0.70864	4.76144e-05	0.000349448	1.78028e-05	0.0573846	3.05458e-05
	WS-1-12	0.00190724	1.22161e-05	2.89241	0.000116289	0.708675	4.5844e-05	5.73449e-05	7.73117e-06	0.0567515	2.73682e-05
	WS-1-13	0.00249069	0.00019218	1.44903	0.00135357	0.708728	7.24472e-05	0.00277872	0.000318795	0.0561818	4.83254e-05
	WS-1-14	0.00161137	0.000856911	2.0181	2.01924e-06	0.708718	5.35785e-05	2.78429e-06	1.09979e-05	0.0562197	3.2622e-05
	WS-1-15	0.00157116	0.0013919	2.05315	7.50956e-06	0.708693	5.40572e-05	7.9393e-07	1.20906e-05	0.0563788	3.44327e-05
	WS-1-16	0.00160153	0.000549525	2.0941	5.39347e-06	0.708629	5.12785e-05	2.34839e-05	1.03559e-05	0.0563401	3.08629e-05
	WS-1-17	0.00158924	0.000429309	1.99859	5.93492e-05	0.70864	5.80158e-05	1.25841e-05	1.24543e-05	0.0566062	4.00429e-05
	WS-1-18	0.0016303	0.000719886	2.30851	3.29512e-05	0.708738	4.68205e-05	4.923e-05	9.33457e-06	0.0565178	3.31277e-05
	WS-1-19	0.00174255	0.000141633	2.24053	7.88845e-05	0.708656	4.95909e-05	0.000178012	1.61062e-05	0.0566216	4.00198e-05
	WS-1-20	0.00169098	0.000163707	2.31237	8.6673e-05	0.708679	5.13106e-05	0.000136773	9.58046e-06	0.0562674	2.80011e-05
	WS-1-21	0.00166659	0.000197394	2.3345	1.94218e-05	0.708677	5.14084e-05	4.37618e-05	9.00161e-06	0.056385	3.06357e-05
	WS-1-22	0.00158054	0.00018342	2.20915	0.000156638	0.708626	4.52465e-05	0.000260001	1.10425e-05	0.0571232	3.58258e-05
	WS-1-23	0.00160831	0.00036977	2.09459	9.53124e-05	0.708593	4.94465e-05	0.000186466	1.40794e-05	0.0568623	3.07043e-05
	WS-1-24	0.00163579	0.0007063	2.26835	0.000272554	0.708761	4.64346e-05	0.000390381	2.72943e-05	0.0577137	0.000112793
	WS-1-25	0.00169103	0.00122918	2.32755	0.000388469	0.708731	4.76227e-05	0.000520761	4.3546e-05	0.0583042	0.00018976
	WS-1-26	0.00155081	0.000334768	2.294	2.64653e-05	0.708619	5.14723e-05	4.0184e-05	9.30911e-06	0.056253	2.7993e-05
	WS-1-27	0.00154758	0.000245869	2.27854	0.000123049	0.708682	5.31588e-05	0.000202878	1.03612e-05	0.0571551	3.67849e-05
	WS-1-28	0.00157252	0.000265874	2.25405	3.5959e-07	0.708667	5.09612e-05	3.16025e-05	1.30163e-05	0.0561098	3.10321e-05
	WS-1-29	0.00156355	0.000149776	2.30645	0.000180092	0.708768	5.72512e-05	0.000255129	2.2651e-05	0.057295	9.22689e-05
	WS-1-30	0.00145727	0.000409373	2.27213	0.000155544	0.708669	4.58079e-05	0.000266459	1.60177e-05	0.0574509	3.76365e-05
	WS-1-31	0.00148774	0.000678232	2.21067	0.000102814	0.708597	4.7913e-05	0.000196672	1.11179e-05	0.0572652	3.3623e-05
	WS-1-32	0.00147089	0.0011215	2.13537	1.31867e-05	0.708662	5.22636e-05	4.00204e-05	1.0374e-05	0.0561171	3.02132e-05
	WS-1-33	0.00141752	0.000748212	2.22023	7.60151e-05	0.708706	6.38084e-05	9.81208e-05	1.47577e-05	0.0563001	3.09722e-05
	WS-1-34	0.00143167	0.000124542	2.23305	6.1886e-05	0.708717	5.01606e-05	9.47639e-05	1.10747e-05	0.0568375	3.12948e-05
	WS-1-35	0.00137077	0.000144606	1.95412	9.33813e-05	0.708762	5.63285e-05	0.000203129	1.56505e-05	0.0568676	4.535e-05
	WS-1-36	0.0014386	0.000148654	2.05881	0.000158129	0.708748	5.18462e-05	0.00028635	1.34899e-05	0.0571322	3.90955e-05
	WS-1-37	0.00134535	0.000674247	1.80292	2.32555e-07	0.70864	6.14055e-05	1.78046e-05	1.4172e-05	0.0562686	4.27247e-05
	WS-1-38	0.00153085	0.000143006	2.2722	0.000111315	0.70868	5.2299e-05	0.00020679	9.6859e-06	0.0571898	3.57053e-05
	WS-1-39	0.00135365	9.05872e-05	1.88979	8.84675e-05	0.708687	6.07743e-05	0.000196013	1.44191e-05	0.0564604	4.70418e-05
	WS-1-40	0.0013008	0.000130375	1.7967	1.32338e-05	0.70862	6.09342e-05	3.491e-05	1.22203e-05	0.0567212	3.85089e-05
	WS-1-41	0.00129653	0.000137232	1.92229	3.93801e-05	0.708742	5.73723e-05	7.12825e-05	1.17313e-05	0.0564828	3.50813e-05
	WS-1-42	0.00128421	0.000124657	1.9378	6.60421e-05	0.708658	5.63809e-05	0.000118936	3.0695e-05	0.0566921	4.07376e-05
	WS-1-43	0.00154073	0.00014418	2.25684	0.000139758	0.708631	4.75926e-05	0.000214157	1.16838e-05	0.0571618	3.52836e-05
	WS-1-44	0.00153423	0.000232356	2.24334	2.30901e-05	0.708646	4.91125e-05	4.69476e-05	1.47469e-05	0.0560404	0.000224096
	WS-1-45	0.00153309	0.000747323	2.26296	7.64887e-05	0.70867	5.12629e-05	0.000134792	1.07301e-05	0.0567351	3.60836e-05
	WS-1-46	0.001523	0.000189385	2.26658	4.79138e-05	0.708659	5.22164e-05	7.88417e-05	1.01757e-05	0.0565862	3.70105e-05
	WS-1-47	0.00153807	0.000240937	2.26719	1.05888e-05	0.708713	4.84067e-05	3.87427e-06	9.12615e-06	0.0563073	3.20735e-05
	WS-1-48	0.00153973	0.00471213	2.2704	0.000119831	0.708649	5.02604e-05	0.000183684	4.74767e-05	0.0563731	2.99039e-05
	Mean					0.708714
	2SD					8.66264e-05
		blank	blank	signal	signal
	Sample name	83Kr	88Sr	88Sr	85Rb	87Sr/86Sr	SE	87Rb/86Sr	SE	84Sr/86Sr	SE
Session1	BZS-1	0.00228164	0.0001867	2.37605	3.23396e-06	0.711793	5.3651e-05	3.10811e-06	8.24365e-06	0.0566838	2.86712e-05
	BZS-2	0.00216263	0.000137449	2.3242	6.69599e-06	0.71184	5.09617e-05	6.10795e-06	9.35458e-06	0.056815	2.96257e-05
	BZS-3	0.00206986	0.000128972	2.29436	3.14834e-06	0.711802	5.11683e-05	1.43854e-05	9.45523e-06	0.0567891	2.66693e-05
	BZS-4	0.00199889	0.000449696	2.22919	3.92078e-06	0.711837	5.36433e-05	1.11359e-05	1.11308e-05	0.0566637	3.41306e-05
	BZS-5	0.0019433	0.000110373	2.29438	1.60159e-05	0.711768	5.18239e-05	4.49314e-05	1.00051e-05	0.0566967	2.71113e-05
	BZS-6	0.00191062	0.000132768	2.14623	5.1333e-06	0.711786	5.19152e-05	3.06485e-05	1.12521e-05	0.0565432	3.22255e-05
	BZS-7	0.0018772	0.000127474	2.27338	1.60663e-06	0.711761	4.85126e-05	5.76748e-05	9.73973e-06	0.056877	3.12538e-05
	BZS-8	0.00186246	0.000276172	2.00846	9.14981e-06	0.711846	5.58206e-05	2.37544e-05	1.11491e-05	0.0566124	3.21691e-05
	BZS-9	0.00182083	0.00206973	1.24251	4.43179e-06	0.711821	8.21438e-05	7.15296e-05	1.72004e-05	0.0567334	5.14477e-05
	BZS-10	0.00174329	0.000426136	2.00421	9.27476e-06	0.711828	5.6708e-05	5.96417e-06	1.08964e-05	0.0564706	4.81428e-05
	BZS-11	0.00115357	0.000206635	1.66304	3.81985e-05	0.711927	6.29671e-05	5.01766e-05	3.61003e-05	0.0565436	3.78003e-05
	BZS-12	0.0011135	5.46719e-05	1.83016	4.9747e-05	0.711812	5.99757e-05	0.000110042	3.18253e-05	0.0568225	4.01126e-05
	BZS-13	0.0011197	7.64941e-05	1.64816	2.02216e-05	0.711796	5.97861e-05	5.40372e-05	1.57691e-05	0.0567329	4.09731e-05
	BZS-14	0.0011479	0.000529218	1.818	8.20097e-07	0.711875	6.24418e-05	1.3534e-06	1.39284e-05	0.0566102	3.75744e-05
	BZS-15	0.00113041	0.00152504	1.64289	1.72399e-05	0.711845	6.54589e-05	4.1434e-05	1.93837e-05	0.0565923	3.84819e-05
	BZS-16	0.0011433	0.00158493	1.87491	0.000159717	0.71176	6.36581e-05	0.000118319	0.000123051	0.0565083	3.62677e-05
	BZS-17	0.00114122	0.000425351	1.80882	1.08275e-05	0.711824	6.79407e-05	4.65898e-05	1.26156e-05	0.0564651	3.60753e-05
	BZS-18	0.00106834	7.08988e-05	1.90282	9.38597e-06	0.711805	7.02825e-05	4.06968e-05	1.3773e-05	0.0566404	3.69033e-05
	BZS-19	0.00106739	0.00065607	1.8494	4.04323e-05	0.711852	6.0501e-05	5.21977e-05	4.8263e-05	0.0566727	3.57555e-05
	BZS-20	0.00109418	0.000106296	1.88428	3.68297e-05	0.711739	6.16212e-05	7.01301e-05	3.06222e-05	0.0564523	3.4783e-05
	BZS-21	0.00173777	0.000114222	1.84786	5.91638e-06	0.711757	5.61545e-05	8.79813e-06	1.09143e-05	0.0567707	3.58347e-05
	BZS-22	0.00110853	0.00108312	1.7687	9.26154e-06	0.711873	6.67078e-05	2.42334e-05	2.07162e-05	0.056499	4.38914e-05
	BZS-23	0.0017009	0.000114035	1.66516	7.66596e-06	0.711805	6.16857e-05	9.11335e-06	1.32733e-05	0.056399	3.90588e-05
	BZS-24	0.00165093	9.35835e-05	1.96679	1.38096e-07	0.711868	5.71065e-05	2.36398e-05	1.21352e-05	0.0565063	3.09983e-05
	BZS-25	0.00163493	0.000603599	1.80484	5.8227e-06	0.711847	5.7677e-05	1.13002e-05	1.12452e-05	0.056651	3.70999e-05
	BZS-26	0.00160749	9.34173e-05	2.1613	2.71165e-06	0.711661	5.0234e-05	3.25041e-05	1.07115e-05	0.0565104	3.06309e-05
	BZS-27	0.00158037	0.00015131	2.14694	2.63857e-06	0.711778	5.23775e-05	7.62062e-05	1.0964e-05	0.0565032	3.13033e-05
	BZS-28	0.00155703	0.000214942	2.07449	1.41822e-05	0.711747	5.29271e-05	4.14105e-05	1.11146e-05	0.0565348	3.05501e-05
	BZS-29	0.00154679	0.000417373	2.10752	3.56194e-07	0.711788	5.60976e-05	3.89726e-05	1.04542e-05	0.0564914	2.77424e-05
	BZS-30	0.00156842	0.000256711	2.07683	6.01826e-05	0.711845	5.27451e-05	3.15927e-05	3.9291e-05	0.0564959	3.15213e-05
	BZS-31	0.0015842	0.000131241	2.10292	2.64771e-05	0.711841	5.34445e-05	5.34805e-05	2.60239e-05	0.0564765	3.34502e-05
	BZS-32	0.00155228	0.000720637	2.09171	0.000176877	0.71185	5.30516e-05	0.000268	0.000157286	0.0565362	2.95719e-05
	BZS-33	0.00157147	0.00137913	2.21378	1.96678e-05	0.711753	5.05351e-05	6.79713e-05	1.41403e-05	0.0564769	3.04869e-05
	BZS-34	0.00157661	0.000135652	2.25579	4.18965e-07	0.711911	4.85427e-05	1.19627e-05	1.0539e-05	0.0564841	2.80567e-05
	BZS-35	0.0015719	0.0026206	2.21324	4.24175e-05	0.711718	5.13626e-05	0.00011661	1.84998e-05	0.05639	3.02964e-05
	BZS-36	0.00155477	0.00014232	2.25322	8.29139e-06	0.711709	5.42563e-05	3.20759e-06	9.51151e-06	0.0565671	2.79409e-05
	BZS-37	0.0015918	0.000126829	1.95006	5.33732e-05	0.711772	5.83463e-05	9.49983e-05	4.15089e-05	0.056469	3.88436e-05
	BZS-38	0.00157104	0.000137658	2.21432	3.08193e-06	0.711788	4.97076e-05	1.93321e-05	9.78084e-06	0.0565638	3.06775e-05
	BZS-39	0.00158318	0.000203343	1.92389	2.04485e-06	0.711749	5.60444e-05	2.65677e-05	1.17152e-05	0.0564764	3.37756e-05
	BZS-40	0.00160985	0.000174326	2.13691	1.35263e-05	0.711835	5.2338e-05	2.98076e-05	1.0506e-05	0.0565514	3.51924e-05
	BZS-41	0.00162321	0.000176346	2.17359	9.6385e-05	0.711783	5.56145e-05	0.000118357	6.48904e-05	0.0563747	3.29464e-05
	BZS-42	0.00162807	0.00125044	2.10567	5.03665e-05	0.711672	5.15462e-05	8.71281e-05	2.66688e-05	0.0566198	3.48776e-05
	BZS-43	0.0016167	0.00024759	1.87083	1.3689e-05	0.711773	5.643e-05	4.45302e-05	1.41238e-05	0.0564864	4.16274e-05
	BZS-44	0.00162863	0.000669065	2.12096	4.27215e-05	0.71189	5.04691e-05	4.06567e-05	2.69991e-05	0.0563858	3.4396e-05
	BZS-45	0.00159478	0.000384761	2.17004	9.48261e-06	0.711841	5.15935e-05	6.6164e-06	9.66206e-06	0.0564259	3.47417e-05
	BZS-46	0.00158666	0.000176871	1.51594	4.95148e-06	0.711901	6.15074e-05	2.479e-06	1.60632e-05	0.0568162	4.39693e-05
	BZS-47	0.00156493	0.00012529	1.5352	2.37207e-06	0.711871	6.88343e-05	3.38935e-05	1.36528e-05	0.0566073	4.36928e-05
	BZS-48	0.00159517	0.000192608	1.82942	1.29559e-05	0.711773	5.43852e-05	3.97228e-05	1.54543e-05	0.0566661	3.22831e-05
	BZS-49	0.00156191	0.000173975	1.00594	4.07145e-06	0.711797	8.99254e-05	6.47078e-05	2.26412e-05	0.0565554	6.60617e-05
	BZS-50	0.00158455	0.000143547	1.95569	6.04143e-06	0.711816	5.38511e-05	3.32968e-07	1.31553e-05	0.0564592	3.24501e-05
	BZS-51	0.0015969	0.000396139	1.7358	2.5406e-06	0.71191	4.98803e-05	1.1242e-05	1.17403e-05	0.0564932	3.94242e-05
	BZS-52	0.00154318	0.000154895	1.73076	4.12386e-06	0.711816	6.28734e-05	1.3212e-05	1.26667e-05	0.0565504	3.74188e-05
	BZS-53	0.00152279	0.000127595	1.84237	1.06145e-05	0.71179	5.51193e-05	3.98503e-05	1.63439e-05	0.0567323	3.88634e-05
	BZS-54	0.00152901	0.00427233	2.05436	1.82695e-05	0.711863	4.98447e-05	4.3246e-05	2.44862e-05	0.0565882	3.55406e-05
	BZS-55	0.00151775	0.000173522	1.90198	6.59821e-06	0.711736	6.08949e-05	2.92362e-05	1.14984e-05	0.0566602	3.55771e-05
	BZS-56	0.00152645	0.000138543	1.60247	4.47754e-06	0.711877	5.86326e-05	3.54596e-05	1.50888e-05	0.0568773	4.42233e-05
	BZS-57	0.00156347	0.0013229	1.46762	0.000336028	0.711802	6.59229e-05	0.00085818	0.000463174	0.0569104	4.35086e-05
	BZS-58	0.00156861	0.000136269	1.55953	1.64952e-06	0.711896	6.48519e-05	2.81209e-06	1.38351e-05	0.0564406	3.92605e-05
	BZS-59	0.00151913	0.000116646	2.08227	1.67515e-05	0.711703	5.1606e-05	4.4241e-05	1.7599e-05	0.0565873	3.35034e-05
	BZS-60	0.00159663	0.000597136	1.95491	0.000105352	0.711708	5.36814e-05	0.000167968	9.40798e-05	0.056467	3.52145e-05
	BZS-61	0.00161387	0.000462258	2.06203	2.64179e-05	0.711639	5.22536e-05	7.66442e-05	2.75292e-05	0.0563549	3.21754e-05
	BZS-62	0.0014684	0.00104885	2.00448	1.63607e-05	0.711893	5.63724e-05	8.66266e-06	1.03699e-05	0.0565418	3.46805e-05
	BZS-63	0.00146055	0.000177283	1.9826	3.76816e-07	0.711669	5.89535e-05	2.69418e-05	1.10243e-05	0.0568929	3.45939e-05
	BZS-64	0.00149186	0.000182413	1.67406	2.90339e-06	0.711834	6.19712e-05	1.87124e-05	1.27927e-05	0.0566791	3.81464e-05
	BZS-65	0.00152831	0.000146887	1.02683	9.24942e-06	0.711829	0.000100668	9.38201e-05	2.30074e-05	0.0567163	6.39301e-05
	BZS-66	0.00143006	0.000285885	1.65596	6.49912e-06	0.711667	5.63714e-05	3.19776e-05	1.33214e-05	0.0568318	4.30753e-05
	BZS-67	0.00149483	0.000135873	1.54781	3.01994e-06	0.711875	6.13246e-05	4.02549e-05	1.66993e-05	0.0566235	4.67248e-05
	BZS-68	0.00147657	0.000187195	1.48494	8.86815e-06	0.711896	6.19606e-05	2.83457e-05	1.4763e-05	0.056463	4.55967e-05
	BZS-69	0.00145171	0.0014964	1.5445	1.21687e-07	0.711872	7.11002e-05	2.45172e-05	1.37557e-05	0.0565764	4.08907e-05
	BZS-70	0.00134995	0.000136062	1.41425	6.7222e-06	0.71176	7.07881e-05	3.44519e-05	1.58805e-05	0.0573706	4.56023e-05
	BZS-71	0.00144733	0.00141152	1.84522	7.13261e-05	0.711867	5.7913e-05	0.00011879	8.36968e-05	0.056488	3.67057e-05
	BZS-72	0.00149357	0.000130793	1.91038	7.0391e-05	0.711866	5.65401e-05	9.70017e-05	7.37112e-05	0.0564963	3.4487e-05
	BZS-73	0.00141324	0.000707555	1.64372	1.91498e-05	0.711814	6.35302e-05	3.13023e-05	2.48241e-05	0.0564843	4.06109e-05
	BZS-74	0.00138011	0.000158746	0.436295	6.36907e-06	0.71192	0.00010644	0.000122854	5.14593e-05	0.0587545	0.000163639
	BZS-75	0.0013819	0.00139788	1.47003	1.90467e-05	0.711755	7.29701e-05	4.34442e-05	2.50733e-05	0.0565709	4.71384e-05
	BZS-76	0.00134836	0.00258405	0.88339	1.05054e-06	0.711723	9.36507e-05	1.6607e-05	2.55082e-05	0.0569511	7.85916e-05
	BZS-77	0.00134883	0.000566993	1.80479	2.36765e-06	0.711794	5.70207e-05	2.74275e-05	1.29746e-05	0.0565482	3.62493e-05
	BZS-78	0.00138053	0.000470464	1.49534	9.41105e-05	0.711836	7.13129e-05	0.000198811	8.20687e-05	0.0565726	4.95443e-05
	BZS-79	0.00144547	0.00383744	0.946995	2.16081e-05	0.711734	0.000102264	1.97203e-05	5.30107e-05	0.0565738	6.5236e-05
	BZS-80	0.00141497	0.00222877	1.13527	3.57258e-05	0.711716	8.89194e-05	0.000114316	3.71721e-05	0.0565935	5.80274e-05
	BZS-81	0.00143789	0.00250665	1.03092	1.3804e-05	0.711902	9.25318e-05	7.14133e-05	4.19729e-05	0.0564647	6.13779e-05
	BZS-82	0.00138446	0.000620104	1.32355	4.98434e-05	0.711698	7.55753e-05	0.000208911	2.13334e-05	0.0566132	5.08188e-05
	BZS-83	0.00142954	0.000828842	1.52089	1.48276e-07	0.711829	6.68571e-05	0.000110916	1.5518e-05	0.0563575	4.32866e-05
	BZS-84	0.0013951	0.00165128	1.67768	3.18737e-05	0.711913	6.14425e-05	5.13873e-05	2.63988e-05	0.0564856	4.24534e-05
	BZS-85	0.00134453	0.00350105	0.974755	4.15284e-05	0.711698	9.98506e-05	0.000186929	8.76601e-05	0.0569006	6.45263e-05
	BZS-86	0.00133287	0.00065789	1.01634	4.50687e-06	0.71189	9.40669e-05	9.36637e-06	2.73004e-05	0.0573228	7.08187e-05
	BZS-87	0.00130225	0.00255926	1.8008	9.74121e-06	0.711675	5.81248e-05	6.50222e-05	1.97242e-05	0.0568288	4.06411e-05
	BZS-88	0.00133478	0.000108012	1.29313	2.91918e-06	0.711795	7.45478e-05	6.9076e-05	2.45341e-05	0.0567655	5.10168e-05
	BZS-89	0.00133328	0.000124647	1.60151	3.20376e-05	0.711784	7.06981e-05	0.000121063	3.66271e-05	0.0562852	4.23972e-05
	BZS-90	0.00129848	0.000120266	1.45825	1.37831e-06	0.711875	7.38469e-05	5.90069e-05	1.53221e-05	0.0565853	4.72335e-05
	BZS-91	0.00128836	9.56534e-05	1.46594	6.72747e-06	0.711887	7.23272e-05	2.94402e-05	1.60681e-05	0.0566333	4.88553e-05
	BZS-92	0.0012303	9.93577e-05	1.81669	2.99044e-07	0.711711	6.37826e-05	2.49538e-05	1.20325e-05	0.0569093	3.85709e-05
	BZS-93	0.00124731	0.000123189	1.52754	8.40677e-07	0.711838	6.98834e-05	4.05704e-05	1.38836e-05	0.0564814	4.06978e-05
	BZS-94	0.00124668	0.00167626	1.04186	1.66118e-05	0.711705	0.000143164	0.000116769	4.99766e-05	0.0566562	0.000106468
	BZS-95	0.00123839	8.677e-05	1.85142	3.05686e-09	0.711879	4.86786e-05	1.99791e-05	1.22258e-05	0.0567357	3.39515e-05
	BZS-96	0.00123656	8.97461e-05	0.933597	3.49224e-06	0.711814	0.00010544	4.29883e-05	2.70996e-05	0.0570641	7.05733e-05
	BZS-97	0.00125696	0.00236165	1.68551	2.21214e-06	0.711757	6.66369e-05	2.06946e-05	1.44534e-05	0.0564083	4.03951e-05
	BZS-98	0.0012406	0.000595288	0.839517	6.28001e-06	0.711824	0.000127179	8.50646e-05	2.64399e-05	0.0571012	0.000105242
	BZS-99	0.00125306	9.01825e-05	1.54687	2.83219e-05	0.711848	7.09298e-05	7.70382e-05	2.33293e-05	0.0566361	3.97714e-05
	BZS-100	0.00123639	0.000990874	0.398202	3.10114e-05	0.71173	0.000219692	0.000212843	8.54997e-05	0.0569041	0.00017254
	BZS-101	0.00125859	0.000748356	1.62319	8.34473e-06	0.711847	7.29757e-05	0.000122672	1.84117e-05	0.0565231	3.80552e-05
	BZS-102	0.00125492	0.000909942	0.630561	1.79581e-05	0.711782	0.000152326	5.67189e-05	4.6531e-05	0.0571233	0.000100235
	BZS-103	0.00122016	0.00013089	1.56928	6.35276e-05	0.711898	6.62901e-05	0.000125043	5.14467e-05	0.0566963	4.0431e-05
	BZS-104	0.00130416	0.00112267	1.09351	6.34749e-06	0.711718	0.000102045	1.52373e-06	2.08595e-05	0.0562859	5.67705e-05
	BZS-105	0.00121536	0.00174236	0.894601	8.06616e-06	0.711914	0.000112201	5.07637e-05	2.57985e-05	0.0566774	7.62055e-05
	BZS-106	0.00116834	0.000362532	1.00626	1.61051e-05	0.711859	9.4114e-05	3.90895e-05	2.12829e-05	0.0571039	5.87722e-05
	BZS-107	0.00127378	0.00289724	1.5323	1.22746e-06	0.71192	7.0223e-05	1.39622e-05	1.38335e-05	0.0560686	4.09579e-05
	BZS-108	0.001183	0.000835809	1.669	1.22099e-06	0.711818	7.09966e-05	4.52838e-05	1.31958e-05	0.0565325	3.91896e-05
	BZS-109	0.00123812	0.00152244	1.57187	3.31439e-05	0.711676	7.35989e-05	9.38184e-05	3.0002e-05	0.0566924	5.7131e-05
	BZS-110	0.00120744	0.00148082	1.33474	5.41332e-05	0.711826	7.71122e-05	1.04824e-05	3.41023e-05	0.0567591	5.17493e-05
	BZS-111	0.00122115	0.000555843	0.733102	3.28689e-05	0.711876	0.000121708	0.000879561	6.54085e-05	0.0571972	0.000105024
Session2	BZS-1	0.00529761	0.00021174	2.55663	7.07587e-05	0.711846	4.61778e-05	1.81903e-05	9.17282e-06	0.0563734	3.08333e-05
	BZS-2	0.00631082	0.000334845	2.27841	7.36683e-05	0.711806	5.16556e-05	4.24501e-05	1.26545e-05	0.0564787	3.71622e-05
	BZS-3	0.00486334	0.000253976	1.23232	7.01756e-05	0.711895	9.2682e-05	0.000108648	2.38535e-05	0.0563289	6.80199e-05
	BZS-4	0.0046611	0.000184183	2.44806	6.76031e-05	0.71176	4.5671e-05	2.22656e-05	1.05521e-05	0.0565489	2.89305e-05
	BZS-5	0.00461258	0.000242013	2.38923	6.05424e-05	0.711864	4.69098e-05	4.53045e-05	8.90985e-06	0.0565583	3.43634e-05
	BZS-6	0.0045824	0.000166823	2.42635	4.8718e-05	0.711852	4.89269e-05	4.50484e-07	9.33713e-06	0.0564019	3.07335e-05
	BZS-7	0.00450239	0.000138559	2.71942	8.44405e-05	0.711751	4.79038e-05	4.66161e-05	1.00275e-05	0.0564581	2.95734e-05
	BZS-8	0.00447095	0.000172575	2.60442	4.94627e-05	0.711837	4.46682e-05	2.4468e-05	8.62813e-06	0.0564794	2.72595e-05
	BZS-9	0.00447778	0.00015177	2.47102	0.000112572	0.711752	5.28866e-05	8.25253e-05	4.60447e-05	0.0564709	2.75946e-05
	BZS-10	0.00446695	0.00014918	2.56695	5.81251e-05	0.711778	4.57546e-05	4.54619e-05	8.12909e-06	0.056451	3.21445e-05
	BZS-11	0.0059718	0.000314058	2.30494	6.04603e-05	0.711877	5.26742e-05	2.54223e-05	1.03841e-05	0.0565541	3.84171e-05
	BZS-12	0.00539259	0.000239381	2.34919	5.0259e-05	0.711883	4.65096e-05	-1.92104e-06	8.79109e-06	0.0562742	3.22497e-05
	BZS-13	0.00501085	0.000200214	2.36635	4.82925e-05	0.71179	4.74391e-05	8.60927e-06	1.13997e-05	0.0564098	2.86534e-05
	BZS-14	0.00473302	0.00039559	2.39034	4.3332e-05	0.711849	4.9597e-05	1.01763e-05	1.00029e-05	0.0564138	3.39919e-05
	BZS-15	0.0045513	0.000176569	2.5121	5.19681e-05	0.7118	4.45906e-05	6.42452e-06	8.88871e-06	0.0565678	3.29445e-05
	BZS-16	0.00440431	0.00037784	2.5686	6.41855e-05	0.711838	4.8112e-05	2.72076e-05	9.97238e-06	0.0565248	2.71992e-05
	BZS-17	0.00426539	0.000351091	2.4446	5.62923e-05	0.711894	5.29748e-05	3.79691e-05	9.6398e-06	0.0565767	3.18585e-05
	BZS-18	0.00426539	0.000351091	2.4446	5.62923e-05	0.711907	5.35551e-05	3.78624e-05	9.628e-06	0.0565682	3.13812e-05
	BZS-19	0.00416088	0.000205882	2.35616	3.99028e-05	0.711896	4.46431e-05	1.94515e-05	8.99973e-06	0.0566033	2.86935e-05
	BZS-20	0.0040261	0.000127866	2.43176	5.12781e-05	0.711853	4.83462e-05	3.67191e-05	1.16106e-05	0.0566154	3.03678e-05
	BZS-21	0.00399823	0.00015129	2.51135	6.98549e-05	0.711767	4.83203e-05	5.30796e-05	2.2553e-05	0.0565715	2.94674e-05
	BZS-22	0.00375621	0.000312693	2.36029	3.61531e-05	0.711872	4.36286e-05	-9.35674e-06	9.08364e-06	0.0565669	3.29173e-05
	BZS-23	0.00366481	0.000234533	2.25554	3.35007e-05	0.711864	5.3246e-05	2.40862e-05	9.53046e-06	0.0564581	3.05706e-05
	BZS-24	0.00358031	0.00021405	2.3551	4.66191e-05	0.711733	4.41448e-05	-1.30701e-05	1.04466e-05	0.0564653	3.20867e-05
	BZS-25	0.00342934	0.000154829	2.40813	2.60209e-05	0.711786	5.38781e-05	3.16445e-06	9.37894e-06	0.056493	2.87821e-05
	BZS-26	0.00333198	0.000185444	2.44437	3.46e-05	0.711802	4.88089e-05	5.77194e-06	8.6034e-06	0.0563913	3.35009e-05
	BZS-27	0.0033366	0.00103375	2.14366	4.34716e-05	0.711735	5.86394e-05	5.47318e-05	1.01565e-05	0.0562945	3.2773e-05
	BZS-28	0.00324603	0.000872516	2.32414	4.17655e-05	0.711778	4.49346e-05	8.69528e-06	1.17638e-05	0.0565428	3.32528e-05
	BZS-29	0.00324004	0.000123559	2.45347	2.64485e-05	0.711878	4.45997e-05	1.9347e-05	9.24297e-06	0.0566236	2.78966e-05
	BZS-30	0.00322129	0.000130569	2.39377	3.3189e-05	0.711898	5.19013e-05	1.52672e-05	9.01297e-06	0.0563784	3.02724e-05
	BZS-31	0.00315603	0.000630998	2.42313	4.40868e-05	0.711758	5.00954e-05	4.05168e-05	9.54131e-06	0.0564795	2.90239e-05
	BZS-32	0.00318288	0.000797742	2.27176	2.47182e-05	0.71188	5.13372e-05	1.18325e-05	9.69004e-06	0.0564726	2.99838e-05
	BZS-33	0.00314638	0.000951164	2.41419	3.8664e-05	0.711809	4.73614e-05	1.75584e-05	9.55841e-06	0.0565796	2.69001e-05
	BZS-34	0.00314999	0.000674745	2.34151	4.77648e-05	0.711771	5.20647e-05	3.91313e-05	1.03905e-05	0.0565759	3.14346e-05
	BZS-35	0.00305943	0.000306214	1.78497	3.59917e-05	0.711825	6.02746e-05	3.36638e-05	1.4593e-05	0.0565539	4.419e-05
	BZS-36	0.00299188	0.000500625	1.10364	2.40464e-05	0.711707	0.000100094	6.93491e-05	2.50324e-05	0.0565224	7.87667e-05
	BZS-37	0.00299188	0.000500625	1.10364	2.40464e-05	0.711753	0.000100065	7.03497e-05	2.51466e-05	0.0565298	7.91822e-05
	BZS-38	0.00293705	0.00134427	2.03836	3.35897e-05	0.711817	5.06788e-05	-1.84764e-05	1.06652e-05	0.0565485	3.5392e-05
	BZS-39	0.00293205	0.000243323	0.574832	2.62142e-05	0.711844	0.000144701	0.000596326	4.49064e-05	0.0568148	0.000128545
	BZS-40	0.00295668	0.000147161	1.9388	3.40539e-05	0.711717	5.51044e-05	1.40069e-05	1.30677e-05	0.0564711	4.02801e-05
	BZS-41	0.00299081	0.000323599	2.12895	2.24422e-05	0.711898	5.32952e-05	1.048e-05	1.06136e-05	0.0566524	3.25795e-05
	BZS-42	0.00297019	0.000172045	1.81116	2.12439e-05	0.711781	7.20526e-05	-2.57679e-06	1.29667e-05	0.0563974	3.58288e-05
	BZS-43	0.00297244	0.000962707	1.9537	3.91543e-05	0.711766	5.76375e-05	1.67893e-05	1.25211e-05	0.0563185	3.61902e-05
	BZS-44	0.00301958	0.000120928	1.87551	2.53079e-05	0.711884	5.24837e-05	3.11867e-05	1.27364e-05	0.0564798	3.63456e-05
	BZS-45	0.00298246	0.000284986	1.97362	2.76514e-05	0.711769	5.25186e-05	4.99022e-05	1.10553e-05	0.0565004	3.43184e-05
Session3	BZS-1	0.00514193	0.000238472	2.46235	7.28837e-05	0.711794	4.88231e-05	4.47902e-05	1.05306e-05	0.0564675	3.36997e-05
	BZS-2	0.00463889	0.000197791	2.0877	5.61188e-05	0.711861	6.20924e-05	4.45223e-05	1.39396e-05	0.0564439	4.20043e-05
	BZS-3	0.00454709	0.000158171	2.54616	8.82053e-05	0.711821	4.88204e-05	5.0469e-05	2.22081e-05	0.056447	2.86995e-05
	BZS-4	0.00451683	0.000187923	2.5202	5.60434e-05	0.711826	4.57775e-05	3.84115e-05	8.55569e-06	0.0564341	3.12558e-05
	BZS-5	0.00340721	0.000113731	1.99373	5.99788e-05	0.711877	6.10773e-05	3.11809e-05	2.58586e-05	0.0564797	0.000316683
	BZS-6	0.024388	0.000324372	2.77437	0.000282778	0.711874	5.58893e-05	9.83671e-05	8.49744e-06	0.0564222	0.000244187
	BZS-7	0.00386807	0.000169744	1.99773	4.28564e-05	0.711776	6.23467e-05	2.01524e-05	1.37353e-05	0.0565267	0.000319133
	BZS-8	0.0246884	0.000358843	2.61898	0.000289533	0.711779	7.756e-05	9.45425e-05	2.07238e-05	0.0564261	0.000243562
	BZS-9	0.00514987	0.000221151	2.41275	5.5626e-05	0.711815	4.86226e-05	2.64978e-05	9.97095e-06	0.0564858	3.30717e-05
	BZS-10	0.00376236	0.00021919	1.94111	3.74123e-05	0.711819	5.82277e-05	6.27406e-06	1.36626e-05	0.0564777	0.000319321
	BZS-11	0.0245856	0.000354053	2.63839	0.000268676	0.711859	5.88382e-05	7.26857e-05	9.20805e-06	0.0565751	0.000244147
	BZS-12	0.00503638	0.000362496	2.42129	5.59926e-05	0.711855	5.01277e-05	2.09354e-05	1.01198e-05	0.0564714	3.32028e-05
	BZS-13	0.00473643	0.00025568	2.43529	5.28398e-05	0.711859	4.8025e-05	1.41575e-05	9.10653e-06	0.0565193	3.23509e-05
	BZS-14	0.00456018	0.000309715	2.45985	5.62568e-05	0.711775	4.97021e-05	2.45598e-05	1.03334e-05	0.0565163	2.90779e-05
	BZS-15	0.00438643	0.000317521	2.39703	4.6509e-05	0.71188	4.90716e-05	2.25323e-05	9.54748e-06	0.0565431	3.15147e-05
	BZS-16	0.00428093	0.000218509	2.46282	5.31795e-05	0.711853	4.88306e-05	2.7002e-05	1.00424e-05	0.0565352	3.15645e-05
	BZS-17	0.00418781	0.000245004	2.4787	5.7981e-05	0.711834	4.70252e-05	3.32462e-05	1.38417e-05	0.0565471	2.84534e-05
	BZS-18	0.0040159	0.000263883	2.41221	4.79079e-05	0.711873	4.83165e-05	2.17772e-05	1.01113e-05	0.0565088	3.17146e-05
	BZS-19	0.00397614	0.000245638	2.40383	5.3216e-05	0.711846	5.17071e-05	3.83427e-05	1.39038e-05	0.056452	3.04731e-05
	BZS-20	0.00383247	0.000244209	2.35718	4.08917e-05	0.711761	4.41389e-05	-9.91756e-07	9.51e-06	0.0565411	3.12325e-05
	BZS-21	0.00370675	0.000172409	2.36514	3.69333e-05	0.711895	5.18234e-05	2.13233e-05	1.01733e-05	0.0565627	2.99068e-05
	BZS-22	0.00363684	0.000183595	2.43694	5.0358e-05	0.711834	4.70914e-05	1.52605e-05	1.38677e-05	0.0564455	3.1685e-05
	BZS-23	0.00350738	0.000500425	2.30402	3.52152e-05	0.711859	5.20487e-05	1.61798e-05	9.53968e-06	0.0564107	3.14908e-05
	BZS-24	0.00341427	0.000430831	2.34135	3.66221e-05	0.711772	4.89965e-05	1.28511e-05	9.96588e-06	0.0564936	3.24414e-05
	BZS-25	0.00338565	0.000457121	2.31741	3.88464e-05	0.711849	4.9128e-05	2.03362e-05	9.94869e-06	0.0565654	3.09188e-05
	BZS-26	0.00329889	0.000385971	2.37535	3.36585e-05	0.711811	5.0238e-05	9.0423e-06	1.00519e-05	0.0564485	3.07691e-05
	BZS-27	0.00324268	0.000313334	2.44032	3.50451e-05	0.711813	4.78347e-05	2.18786e-05	9.12923e-06	0.0564426	3.01405e-05
	Mean					0.711813
	2SD					0.000126889
		blank	blank	signal	signal
	Sample name	83Kr	88Sr	88Sr	85Rb	87Sr/86Sr	SE	87Rb/86Sr	SE	84Sr/86Sr	SE
	MNP-1	0.0056687	0.000426293	7.8568	0.000149456	0.706187	2.70207e-05	4.55652e-05	3.25121e-06	0.0565177	1.07448e-05
	MNP-2	0.0149142	0.000347642	6.71893	0.000126516	0.706176	2.62436e-05	1.50285e-05	3.19432e-06	0.0564135	6.02326e-05
	MNP-3	0.00770947	0.000317856	8.88594	0.000205059	0.706142	2.3658e-05	4.4622e-05	3.2446e-06	0.0563952	1.28362e-05
	MNP-4	0.00540015	0.000266325	9.06672	8.00615e-05	0.706146	2.43716e-05	1.35742e-05	2.26284e-06	0.0565577	9.87473e-06
	MNP-5	0.00493	0.000194544	7.97161	0.000358472	0.706165	2.62455e-05	0.000142971	1.5807e-05	0.0564938	9.68501e-06
	MNP-6	0.0152226	0.000167498	7.76663	0.000276162	0.70615	2.94551e-05	7.65977e-05	5.84901e-06	0.0564336	6.96504e-05
	MNP-7	0.00364403	0.000128385	9.53543	0.000271646	0.706172	2.39088e-05	8.52617e-05	6.03821e-06	0.0565058	8.44129e-06
	MNP-8	0.00298151	0.000172887	8.06846	0.000392326	0.706173	2.56708e-05	0.000266574	3.34339e-05	0.056456	9.79068e-06
	MNP-9	0.00302287	0.000286959	8.54155	0.00135373	0.706154	2.38963e-05	0.000517427	4.899e-05	0.056508	8.28352e-06
	MNP-10	0.00280148	0.00120509	9.06833	0.000365915	0.706192	2.65059e-05	0.000110567	1.04376e-05	0.0564627	8.02024e-06
	MNP-11	0.00289827	0.000326743	5.81951	0.000492435	0.706154	3.07625e-05	0.000291356	2.67266e-05	0.0564606	1.26577e-05
	MNP-12	0.00979168	0.000257993	8.61246	0.00108893	0.706159	3.14756e-05	0.000406536	4.57063e-05	0.0564533	2.66403e-05
	MNP-13	0.00373088	0.000251375	7.77715	0.000598565	0.706168	2.49581e-05	0.000261484	2.03217e-05	0.0564167	9.31958e-06
	Mean					0.706165
	2SD					3.0686e-05
	Reference value1					0.70617
1. P. Liang, Z. Bao, W. Yang, C. Zong, K. Chen, Y. Zhang and H. Yuan, Journal of Analytical Atomic Spectrometry, 2023, 38, 414-421.
Bulk Sr isotope values of samples by MC-ICP-MS
	87Sr/86Sr	2SE
BZS-01	0.711807	9.81858e-06
BZS-02	0.711816	9.63928e-06
BZS-03	0.711821	9.24817e-06
mean	0.711815
2SD	1.4243e-05
	87Sr/86Sr	2SE
WS-1-1	0.708718	1.49169e-05
WS-1-2	0.708699	1.35648e-05
WS-1-3	0.708728	1.41256e-05
WS-1-4	0.70873	1.42366e-05
mean	0.708719
2SD	2.87039e-05

## Sheet: Supplementary Table S3
Table S3Trace element compositions analyzed by LA-ICP-MS (ppm)
Name		Li7	Mg25	Ca43	Sc45	Ti49	V51	Cr53	Mn55	Fe57	Zn66	Rb85	Sr88	Y89	Zr91	Nb93	Ba137	La139	Ce140	Pr141	Nd146	Sm149	Eu151	Gd157	Tb159	Dy163	Ho165	Er167	Tm169	Yb173	Lu175	Hf179	Ta181	Pb208	Th232	U238
NIST610-1		471.98	445.96	81476.6	436.27	434.65	445.57	415.56	442.55	485.3	464.51	434.41	517.25	445.73	427.63	448.26	451.83	425.55	460.15	446.46	425.12	441.15	441.42	437.81	423.5	422.39	438.67	444.67	425.24	443.27	431.58	429.02	432.1	445.61	455.34	483.28
NIST610-2		464.91	416.44	81476.6	453.9	450.52	444.03	410.31	450.88	447.15	470.61	425.95	509.94	456.87	446.14	461.75	449.24	443.58	450.55	449.47	435.12	447.24	450.37	453.26	439.54	440.07	451.98	454.6	436.72	451.49	440.79	435.45	450.95	430.45	461.9	464.25
NIST610-3		460.48	429.1	81476.6	445.17	463.78	438.32	401.14	437.95	481.56	451	417.13	505.16	449.03	445.36	454.09	443.64	425.03	439.36	438.72	417.51	447.85	436.22	432.02	428.39	424.95	440.56	446	425.63	437.54	426.1	426.93	439.24	415.15	442	451.64
NIST610-4		466.02	427.45	81476.6	454.11	447.44	447.07	395.12	447.57	456.25	459.32	423.52	523.33	460.53	444.94	465.74	453.3	440.14	450.44	444.75	426.19	455.15	449.95	448.67	433.58	434.6	443.94	446.84	433.04	450.94	434.85	434.01	450.53	425.97	452.92	459.73
NIST610-5		462.05	433.07	81476.6	447.52	464.76	444.76	410.48	433.98	408.02	451.91	421.57	510.48	460.93	441.65	465.31	447.12	437.79	448.81	446.7	433.52	445.94	443.45	440.41	433.56	430.81	440.86	449.61	428.15	442.51	432.98	431.35	442.3	421.75	447.89	455.75
NIST610-6		471.26	450.13	81476.6	460.16	438.35	449.46	399.01	448.58	484.06	465.12	422.18	514.93	471.82	444.26	470.58	457.98	446.69	452.07	450.44	428.73	463.02	451.95	455.32	447.59	446	456.51	461.7	444.81	453.93	445.05	439.47	455.98	430.67	468.08	469.74
NIST610-7		464.57	416.53	81476.6	467.72	445.24	456.79	416.26	448.22	455.31	455.02	427.32	514.17	467.48	453.61	476.18	461.47	445.56	454.46	449.65	432.97	452.13	452.11	450.42	441.79	451.89	457.85	462.43	444.95	460.28	445.76	440.09	455.08	430.88	467.13	463.42
NIST610-8		460.47	463.01	81476.6	469.03	439.88	452.43	408.55	449.23	451.39	461.18	419.99	518.85	472.27	455.75	467.73	449.78	441.73	455.42	449.81	428.52	464.44	447.83	454.54	441.84	449.54	451.8	463.35	438.72	453.31	445.03	435.35	453.85	425.81	458.84	458.84
NIST610-9		467.72	436.17	81476.6	461.44	455.44	459.08	416.25	445.13	467.31	468.6	428.85	517.3	468.7	453.23	469.08	462.24	448.75	461	451.64	436.99	455.56	448.2	459.69	440.4	440.25	454.41	455.96	436.53	453.54	445.14	443.08	451.35	421.83	459.97	461.1
NIST610-10		480.44	431.02	81476.6	456.58	484.66	457.05	396.98	446.82	470.21	450.29	429.24	509.76	467.59	462.44	469.46	455.12	445.4	457.91	451.01	434	458.61	448.37	459.65	440.53	436.61	452.89	457.08	439.67	456.28	443.87	439.11	449.81	422.05	457.82	456.14
NIST610-11		478.12	410.27	81476.6	475.49	458.71	461.61	426.26	444.26	461.96	465.58	438.08	528.76	479.17	465.67	480.65	453.39	456.6	460.79	459.08	441.41	475.7	457.3	461.98	452.21	450.71	464.9	476.1	448.09	462.79	451.86	444.86	454.91	427.57	469.95	462.92
NIST610-12		469.45	437.58	81476.6	454.2	462.44	451.02	399.98	435.52	429.9	455.43	418.95	517.49	463.27	455.28	468.52	442.11	439.44	445.71	441.63	425.76	444.39	442.17	447.4	435.11	432.24	445.09	453.65	429.54	442.02	434.48	427.52	437.76	411.1	450.8	447.72
Mean		468.122	433.061	81476.6	456.799	453.822	450.599	407.992	444.224	458.202	459.881	425.599	515.618	463.616	449.663	466.446	452.268	441.355	453.056	448.28	430.487	454.265	447.445	450.098	438.17	438.338	449.955	455.999	435.924	450.658	439.791	435.52	447.822	425.737	457.72	461.211
RSD(%)		1.3807	3.48469	5.55088e-06	2.39469	3.11423	1.56025	2.35813	1.26239	4.96357	1.54083	1.48597	1.24942	2.09299	2.27235	1.87658	1.4093	2.03671	1.45506	1.16413	1.49522	2.19621	1.2815	2.07827	1.80411	2.25208	1.80154	1.97659	1.77814	1.72643	1.72967	1.37332	1.771	2.05556	1.85099	1.97619
2SD		12.9267	30.1817	0.00904534	21.8779	28.2661	14.061	19.2419	11.2157	45.4863	14.172	12.6485	12.8844	19.4069	20.4359	17.5065	12.7477	17.9783	13.1845	10.4371	12.8734	19.9533	11.4681	18.7084	15.8101	19.7435	16.2123	18.0265	15.5027	15.5606	15.2138	11.9621	15.8618	17.5026	16.9447	18.2288
reference value1		468	432		455	452	450	408	444	458	460	425.7	515.5	462	448	465	452	440	453	448	430	453	447	449	437	437	449	455	435	450	439	435	446	426	457.2	461.5
1. Jochum, K.P., Weis, U., Stoll, B., Kuzmin, D., Yang, Q., Raczek, I., Jacob, D.E., Stracke, A., Birbaum, K., Frick, D.A., Günther, D. and Enzweiler, J. (2011), Determination of Reference Values for NIST SRM 610–617 Glasses Following ISO Guidelines. Geostandards and Geoanalytical Research, 35: 397-429. https://doi.org/10.1111/j.1751-908X.2011.00120.x
Name		Li7	Mg25	Ca43	Sc45	Ti49	V51	Cr53	Mn55	Fe57	Zn66	Rb85	Sr88	Y89	Zr91	Nb93	Ba137	La139	Ce140	Pr141	Nd146	Sm149	Eu151	Gd157	Tb159	Dy163	Ho165	Er	Tm169	Yb173	Lu175	Hf179	Ta181	Pb208	Th232	U238
NIST612-1		41.04	53.44	85263.1	38.33	45.61	40.28	41.27	38.6	26.67	42.4	32.63	79.37	37.78	35.56	38.36	39.32	36.92	39.82	38.69	34.93	37.83	35.99	37.27	36.14	35.57	36.47	39.45	35.83	41.09	36.58	36.27	37.51	41.04	38.39	39.66
NIST612-2		39.05	55.44	85263.1	40.69	38.31	38.45	41.36	39.72	89.35	39.87	32.28	77.69	38.97	41.52	39.32	38.59	36.85	38.91	38.51	36.48	37.03	36.33	39.33	36.9	35.4	38.5	38.38	37.38	39.35	37.56	39.48	38.35	39.39	38.12	38.4
NIST612-3		39.99	55.38	85263.1	39.34	45.32	40.39	36.24	38.32	43.11	41.41	32.79	80.2	39.43	38	38.74	39.59	36.88	39.49	39.82	35.59	39.92	37.3	39.51	38.04	36.3	38.38	39.99	37.35	37.71	37.55	39.01	38.95	40.16	37.95	39.18
NIST612-4		40.61	64.17	85263.1	41.5	52.93	38.73	44.88	40.13	45.26	39.31	31.99	81.01	40.11	39.01	39.89	40.36	36.74	39.85	38.99	35.83	39.89	36.25	38.11	37.07	36.55	38.22	38.02	37.72	36.16	36.18	38.4	37.74	38.79	38.29	37.81
NIST612-5		40.03	51.13	85263.1	40.67	46.72	39.32	36.43	39.99	65.03	42.77	33.36	81.33	40.56	36.71	39.7	44.42	37.2	39.4	39.34	35.35	38.95	36.37	39.36	37.64	36.57	38.92	37.53	36.84	40.71	36.64	37.89	39.11	39.73	37.46	38.62
NIST612-6		40.15	50.22	85263.1	39.92	45.11	38.21	37.85	36.56	49.75	38.03	32.37	80.58	39.46	39.92	38.82	38.74	36.83	39.52	38.5	35.5	38.32	36.57	38.85	36.7	36.41	39.33	38.7	37.7	38.45	37.38	38.31	37.64	39.83	39.42	37.77
NIST612-7		41.86	65.35	85263.1	43.79	56.54	41.47	44.18	41.51	41.75	41.93	33.96	83.28	41.58	40.44	43.94	43.15	39.53	41.4	40.84	39.48	42.08	37.87	41.82	40.98	40.03	40.35	41.56	40.42	40.54	38.97	40.76	40.65	41.6	41.53	40.34
NIST612-8		42.47	63.81	85263.1	41.15	41.05	40.19	33.72	38.03	55.44	40.63	32.51	80.97	39.98	36.87	40.08	40.72	37.9	39.62	39.36	34.81	39.46	36.91	39.57	37.53	35.8	38.19	39.22	37.63	39.18	37.18	36.79	38.39	40.36	38.82	38.68
NIST612-9		41.81	53.82	85263.1	41.41	41.91	40.73	34.61	41.08	22.13	40.93	33.03	83.36	40.5	41.81	39.51	42.38	37.52	40.57	39.52	37.52	37.8	36.51	38.31	37.96	37.57	39.13	38.68	38.22	37.99	38.11	38.91	38.85	40.3	39.2	38.29
NIST612-10		37.93	58.98	85263.1	40.49	45.74	40.31	32.79	39.91	71.04	39.03	30.96	80.63	38.72	42.18	38.96	40.38	37.1	39.4	38.63	34.56	37.97	35.19	40.96	38.1	37.05	38.86	39.86	36.95	40.12	37.36	36.09	37.79	39.18	38.69	37.97
NIST612-11		43.47	60.29	85263.1	39.82	48.29	39.86	34.84	41.12	33	39.86	31.54	82.03	40.12	39.53	39.84	42.41	37.65	39.74	38.42	34.67	37.09	37.28	40.14	36.37	35.86	38.82	37.01	36.86	39.77	37.16	37.82	38.5	38.96	38.91	37.1
NIST612-12		42.89	47.63	85263.1	43.15	47.83	42.01	35.44	40.53	24.41	41.23	32.51	82.89	40.98	40.25	40.94	39.96	37.8	40.98	39.69	37.44	40.27	36.68	40.41	38.19	37.08	39.25	39.61	38.21	39.71	38.18	37.58	38.83	39.54	39.51	37.86
Mean		40.9417	56.6383	85263.1	40.855	46.28	39.9958	37.8008	39.625	47.245	40.6167	32.4942	81.1117	39.8492	39.3167	39.8417	40.835	37.41	39.8917	39.1925	36.0133	38.8842	36.6042	39.47	37.635	36.6825	38.7017	39.0008	37.5925	39.2317	37.4042	38.1092	38.5258	39.9067	38.8575	38.4733
RSD(%)		3.98314	10.3328	6.03929e-06	3.72698	10.6878	2.89994	10.8815	3.71951	43.088	3.53617	2.43234	2.03356	2.62307	5.45152	3.68372	4.52545	2.08874	1.81555	1.83099	4.10116	3.84997	1.89365	3.19909	3.35745	3.3765	2.37595	3.14549	2.94966	3.65185	2.05065	3.54667	2.24879	2.09462	2.67616	2.34393
2SD		3.26153	11.7047	0.0102986	3.04531	9.89266	2.31971	8.22661	2.94771	40.7139	2.87255	1.58074	3.2989	2.09054	4.28671	2.93531	3.69594	1.56279	1.44851	1.43522	2.95393	2.99406	1.38631	2.52536	2.52715	2.47717	1.83907	2.45353	2.2177	2.86536	1.53406	2.70322	1.73273	1.67178	2.07977	1.80358
reference value1		40.2	68		39.9	44	38.8	36.4	38.7	51	39.1	31.4	78.4	38.3	37.9	38.9	39.3	36	38.4	37.9	35.5	37.7	35.6	37.3	37.6	35.5	38.3	38	36.8	39.2	37	36.7	37.6	38.57	37.79	37.38
1. Jochum, K.P., Weis, U., Stoll, B., Kuzmin, D., Yang, Q., Raczek, I., Jacob, D.E., Stracke, A., Birbaum, K., Frick, D.A., Günther, D. and Enzweiler, J. (2011), Determination of Reference Values for NIST SRM 610–617 Glasses Following ISO Guidelines. Geostandards and Geoanalytical Research, 35: 397-429. https://doi.org/10.1111/j.1751-908X.2011.00120.x
Name		Li7	Mg25	Ca43	Sc45	Ti49	V51	Cr53	Mn55	Fe57	Zn66	Rb85	Sr88	Y89	Zr91	Nb93	Ba137	La139	Ce140	Pr141	Nd146	Sm149	Eu151	Gd157	Tb159	Dy163	Ho165	Er167	Tm169	Yb173	Lu175	Hf179	Ta181	Pb208	Th232	U238
WS-1-1		<0.79	634.36	386319	6.9	<4.20	<0.144	<2.83	2288.36	2617.7	2	<0.090	580.11	6.15	<1.75	<0.0236	3.4	0.052	0.055	<0.0140	<0.111	0.034	0.15	<0.205	<0.033	0.51	0.179	0.759	0.112	1.45	0.304	<0.077	<0.0157	3.25	<0.00	<0.00
WS-1-2		<0.75	655.69	386319	6.65	<4.18	<0.131	<2.89	2217.35	2437.63	1.13	<0.092	591.16	12.24	<1.59	<0.023	3.78	0.077	0.161	0.0198	0.154	<0.124	0.077	0.42	0.125	1.16	0.381	1.3	0.129	1.13	0.249	<0.053	<0.0165	2.94	<0.0081	<0.00
WS-1-3		<0.70	645.46	386319	4.74	<4.31	<0.122	<2.57	2238.38	2486.77	1.51	<0.083	579.48	2.26	<1.42	<0.0146	3.9	<0.027	0.034	<0.0131	<0.079	<0.052	0.175	<0.152	0.021	0.13	0.055	0.293	0.073	1.09	0.295	0.032	<0.0164	3.47	<0.00	<0.00
WS-1-4		<0.70	622.38	386319	16.21	<4.05	0.163	<2.80	2251.78	2538.46	1.8	0.089	581.78	192.02	<1.47	<0.0160	4.15	0.63	1.819	0.387	2.86	1.95	0.693	6.41	1.627	17.37	4.78	16.27	2.08	13	1.74	<0.082	<0.0161	3.29	<0.00	<0.0039
WS-1-5		<0.67	664.47	386319	9.97	3.84	<0.129	<2.69	2258.7	2464.68	1.83	<0.084	580.73	6.05	<1.49	<0.0130	4.26	0.031	0.049	0.0202	0.142	0.075	0.094	<0.176	0.026	0.444	0.171	0.609	0.112	1.15	0.239	<0.063	<0.0098	3.45	<0.00	<0.0054
WS-1-6		<0.77	662.88	386319	16.54	5.39	<0.127	<2.63	2267.37	2483.07	<1.00	<0.087	588.18	1.95	<1.46	<0.0132	4.86	<0.022	<0.020	<0.0211	<0.093	<0.070	0.083	0.192	<0.0191	<0.083	0.053	0.39	0.041	0.7	0.199	<0.037	<0.0223	3.25	<0.00	<0.00
WS-1-7		<0.76	631.05	386319	8.63	<4.62	0.157	<2.79	2253.07	2450.97	<0.96	<0.086	571.59	2.26	<1.51	<0.0136	4.02	<0.029	<0.024	<0.0118	<0.111	0.029	0.104	<0.126	0.028	0.272	0.062	0.283	0.05	0.52	0.17	<0.076	<0.0059	3.28	<0.00	<0.00
WS-1-8		<0.66	647.18	386319	17.75	<3.92	0.193	<2.81	2280.29	2585.48	<0.97	<0.093	570.83	65.52	<1.46	<0.0209	2.85	0.216	0.586	0.154	0.74	0.447	0.279	2.98	0.704	6.15	1.832	5.98	0.844	4.64	0.849	<0.083	<0.0152	3.42	<0.00	0.0013
WS-1-9		<0.69	675.76	386319	16.84	<3.98	0.174	<2.74	2295.42	2473.73	<1.02	<0.084	581.43	27.58	<1.34	<0.0247	4.54	0.067	0.217	0.04	0.284	0.315	0.101	1.11	0.272	2.98	1.052	2.98	0.372	2.55	0.431	<0.064	<0.0172	3.24	<0.00	<0.00
WS-1-10		<0.68	636.26	386319	3.25	<3.83	<0.127	<2.53	2205.16	2438.66	1.58	<0.083	548.37	3.63	<1.42	<0.0221	4.61	<0.019	0.032	0.0131	<0.104	0.042	0.139	<0.162	0.03	0.267	0.073	0.393	0.131	1.16	0.315	<0.062	<0.0096	3.16	<0.00	<0.00
WS-1-11		<0.71	639.54	386319	20.17	<4.41	0.197	<2.63	2292.55	2568.29	1.13	<0.081	578.52	2.03	<1.63	<0.020	4.41	<0.021	0.024	<0.0165	<0.060	<0.068	0.108	<0.126	<0.025	0.137	0.032	0.305	0.06	0.94	0.243	<0.051	<0.0194	3.29	<0.00	<0.00
WS-1-12		<0.65	656.29	386319	13.01	<4.12	<0.138	<2.69	2251.44	2495.26	2.01	<0.087	577.86	2.78	<1.48	<0.0237	4.41	<0.024	<0.023	<0.0139	<0.079	0.031	0.04	<0.181	<0.024	0.115	0.072	0.334	0.099	1.15	0.236	<0.050	<0.0095	3.27	<0.0076	<0.00
WS-1-13		<0.77	659.64	386319	14.18	<4.28	0.158	3.55	2232.94	2544.66	1.11	<0.095	567.19	1.94	<1.53	<0.021	3.93	<0.028	0.021	<0.0136	<0.108	<0.070	0.103	<0.163	<0.0211	0.12	0.049	0.293	0.05	1.01	0.242	0.06	<0.0141	3.16	<0.00	<0.00
WS-1-14		<0.66	653.48	386319	5.53	<3.93	0.202	<2.60	2251.15	2472.67	1.55	<0.080	576.34	2.78	<1.53	0.018	4.1	<0.023	<0.022	<0.0170	<0.081	<0.074	0.147	<0.164	0.046	0.193	0.052	0.295	0.094	1.03	0.265	<0.090	<0.0118	3.32	0.0027	<0.00
WS-1-15		<0.63	646.4	386319	1.32	<4.04	<0.135	<2.58	2288.3	2535.35	2.18	<0.087	593.35	1.81	<1.49	<0.0128	4.58	<0.020	<0.019	<0.0148	<0.095	<0.068	0.207	<0.139	<0.022	<0.057	0.038	0.249	0.077	1.07	0.287	<0.036	<0.0192	3.3	<0.00	<0.00
WS-1-16		<0.68	689.69	386319	6.11	<4.26	<0.132	3.8	2302.21	2666.09	2.54	<0.080	595.85	2.48	<1.45	<0.0180	4.93	<0.023	0.027	<0.0110	<0.067	<0.039	0.234	<0.177	<0.024	<0.084	0.048	0.384	0.104	1.06	0.349	<0.062	<0.0136	3.49	<0.00	<0.0038
WS-1-17		<7.98	688.48	386319	1.69	<45.70	2.63	<29.73	2115.25	2009.52	<15.52	<0.85	481.19	9.24	<16.72	<0.182	<4.06	<0.28	<0.308	<0.14	<1.05	<0.79	<0.31	1.92	0.36	<0.85	0.25	2.13	0.09	<1.03	<0.133	<0.36	<0.177	<1.26	<0.00	<0.054
WS-1-18		<0.76	671.12	386319	26.39	<4.07	<0.141	<2.95	2291.17	2528.9	1.53	<0.091	590.31	62.02	<1.53	<0.0218	3.93	0.167	0.588	0.121	0.667	0.72	0.304	2.59	0.644	6.49	2.09	6.43	0.966	4.91	1.053	<0.077	<0.0159	3.39	<0.00	<0.00
WS-1-19		<0.61	645.74	386319	20.04	5.04	<0.128	<2.67	2211.06	2384.64	1.87	<0.084	572.97	116.95	<1.49	<0.0155	4.48	0.425	1.419	0.247	1.71	1.74	0.281	4.27	1.276	10.46	3.65	13.61	1.695	10.27	1.81	<0.094	<0.0110	3	<0.00	<0.00
WS-1-20		<0.72	675.88	386319	3.14	<4.13	<0.134	<2.81	2283.85	2506.8	1.23	<0.088	598.43	4.76	<1.51	<0.0185	9.38	0.028	0.022	<0.0152	<0.087	<0.057	<0.040	<0.166	0.055	0.445	0.118	0.558	0.094	0.92	0.249	<0.064	<0.0139	3.33	0.0111	<0.00
WS-1-21		<0.72	645.43	386319	3.79	<4.29	<0.132	<2.63	2338.05	2448.16	1.54	<0.087	570.48	10.01	<1.53	<0.025	4.03	0.164	0.207	0.026	0.142	0.078	0.147	0.39	0.074	0.651	0.26	0.94	0.224	1.87	0.408	<0.061	<0.0122	3.06	<0.00	<0.00
WS-1-22		<0.70	635.77	386319	7.64	<4.04	0.14	<2.67	2236.67	2477.92	1.6	<0.084	570.16	1.82	<1.62	0.0064	4.79	<0.022	<0.0231	<0.0116	0.071	<0.041	0.107	<0.187	<0.021	<0.065	0.054	0.238	0.097	1.17	0.338	0.054	<0.0101	3.4	<0.00	<0.00
WS-1-23		<0.75	660.03	386319	2.26	<4.36	<0.137	<2.69	2302.8	2598.83	1.51	<0.083	599.78	1.97	<1.60	<0.0244	4.36	<0.019	0.018	<0.0143	<0.163	<0.040	0.118	<0.166	<0.026	<0.090	0.046	0.144	0.087	1.14	0.311	0.014	<0.0080	3.29	<0.00	<0.00
WS-1-24		<0.73	667.09	386319	4.11	<4.24	<0.141	<2.91	2292.26	2529.83	1.56	<0.089	591.37	1.95	<1.59	<0.0274	4.6	<0.026	<0.023	0.0142	<0.102	<0.073	0.142	<0.110	<0.028	0.137	0.034	0.29	0.095	1.02	0.286	<0.067	<0.0133	3.45	<0.00	<0.00
WS-1-25		<0.75	674.02	386319	6.74	<4.12	<0.134	<2.55	2306.76	2533.9	2.12	<0.089	579.18	4.16	<1.47	<0.0093	4.13	<0.023	0.024	<0.0114	<0.076	0.117	0.149	<0.143	<0.021	0.312	0.077	0.334	0.145	1.25	0.238	<0.052	<0.0141	3.54	0.0028	<0.00
WS-1-26		<0.75	649.15	386319	17.16	<4.01	<0.131	<2.73	2279.73	2481.05	1.36	<0.088	577.01	130.7	<1.57	<0.0135	3.91	0.4	0.96	0.277	1.5	0.97	0.379	6.07	1.406	15.57	4.73	18.3	1.83	11.21	1.48	<0.120	0.0108	3.47	0.0027	<0.00
WS-1-27		<0.80	666.78	386319	3.92	<4.12	<0.138	4.37	2253.3	2472.64	2.35	<0.094	591.66	1.92	<1.55	<0.0134	4.8	<0.033	<0.019	<0.0104	<0.089	<0.071	0.08	<0.124	<0.018	<0.065	0.069	0.309	0.087	1.26	0.321	<0.053	<0.0082	3.58	<0.00	0.0013
WS-1-28		<0.71	625.32	386319	14.32	5.01	<0.133	<2.66	2270.99	2469.01	1.6	<0.092	592.5	2.22	<1.52	<0.0206	3.62	<0.0252	<0.019	<0.0101	<0.092	<0.040	0.106	<0.171	<0.0188	0.111	0.031	0.325	0.091	1.28	0.318	<0.063	<0.0179	3.44	<0.00	<0.00
WS-1-29		<0.70	631.17	386319	14.94	<4.36	<0.128	<2.74	2251.07	2524.76	2	<0.087	573.31	93.11	<1.58	<0.0208	4.84	0.329	1.028	0.199	1.14	1.07	0.348	3.54	0.948	10.53	2.62	9.29	1.135	6.63	0.978	<0.052	<0.0172	3.63	<0.0079	0.0027
WS-1-30		<0.75	634.9	386319	0.83	<4.04	<0.131	<2.69	2223.41	2508.41	2.86	<0.088	589.27	3.1	<1.46	<0.0267	4.61	<0.027	<0.018	<0.0146	<0.083	<0.041	0.048	<0.181	<0.019	0.311	0.091	0.519	0.078	1.1	0.312	<0.075	<0.0101	3.33	<0.00	<0.00
WS-1-31		<0.75	657.59	386319	16.04	<4.48	0.142	<2.50	2270.19	2534.96	<1.08	<0.087	575.17	84.33	<1.69	<0.0248	2.77	0.222	0.806	0.191	1.41	0.8	0.254	3.55	1.182	9.76	2.41	7.67	0.971	7.06	1.111	<0.037	0.0066	3.48	<0.00	<0.00
WS-1-32		<0.75	630.63	386319	1.52	6.1	<0.137	3.53	2317.47	2572.57	2.21	<0.080	572.11	3.9	<2.82	<0.0162	4.64	<0.019	0.031	0.0117	<0.069	<0.107	0.069	<0.179	0.045	0.298	0.08	0.46	0.15	1.06	0.21	<0.074	<0.0152	3.13	<0.00	<0.0039
WS-1-33		<0.78	668.16	386319	18.15	<4.51	0.321	<2.69	2242.88	2373.03	<0.96	<0.088	574.17	162.51	<1.58	<0.0131	3.59	0.464	1.471	0.329	2.12	1.6	0.473	6.44	1.618	15.46	4.54	16.45	2.15	11.49	1.56	<0.073	<0.0180	3.32	<0.00	<0.00
WS-1-34		<0.74	672.13	386319	11.63	<4.42	0.259	<2.89	2290.77	2560.28	1.72	<0.095	588.46	5.56	<1.62	<0.022	3.92	<0.025	0.099	0.0238	0.096	0.137	0.1	0.34	0.058	0.516	0.188	0.72	0.135	1.31	0.356	<0.039	<0.0135	3.45	<0.00	<0.00
WS-1-35		<0.72	647.69	386319	16.3	<4.48	0.136	<2.80	2275.3	2501.3	1.71	<0.091	561.81	1.49	<1.65	0.021	4.56	<0.025	<0.019	0.0157	<0.047	<0.107	0.133	<0.193	0.0202	<0.064	0.035	0.292	0.09	0.75	0.319	<0.089	<0.0175	3.55	<0.00	<0.00
WS-1-36		<0.74	668.33	386319	35.93	<4.64	0.238	<2.74	2327.3	2387.06	1.61	<0.079	566.98	8.16	<1.58	<0.0221	3.48	0.071	0.058	<0.0195	0.109	0.078	0.095	<0.183	0.065	0.67	0.307	1.01	0.117	1.7	0.388	<0.088	<0.0149	3.63	<0.00	<0.00
WS-1-37		<0.76	630.75	386319	19.51	<4.20	0.18	<2.83	2302.93	2393.23	1.65	<0.082	562.06	42.89	<1.57	<0.0219	4.31	0.101	0.282	0.056	0.418	0.63	0.309	3.35	0.468	4.45	1.55	5.73	0.77	4.28	0.988	<0.00	<0.0121	3.49	<0.00	<0.00
WS-1-38		<0.64	647.42	386319	19.56	<4.28	<0.130	<2.82	2320.84	2480.2	1.2	<0.085	562.82	63.95	<1.57	<0.0162	4.69	0.219	1.66	0.157	1.21	0.71	0.249	2.34	0.59	5.99	1.751	5.78	0.778	4.79	0.972	0.026	<0.0081	3.48	<0.00	<0.0039
WS-1-39		<0.67	652.38	386319	4.76	<4.57	<0.127	<2.69	2373.21	2494.44	1.38	<0.084	576.67	8.1	<1.55	<0.030	3.77	0.034	0.112	<0.0147	0.194	<0.082	0.12	0.34	0.075	0.76	0.213	0.78	0.163	1.51	0.427	<0.075	<0.0155	3.39	<0.0081	<0.00
WS-1-40		<0.69	636.87	386319	16.81	<3.60	<0.141	4	2259.39	2396.06	<1.07	<0.083	537.07	4.34	<1.47	<0.0240	4.25	0.022	0.041	<0.0086	<0.113	<0.039	0.079	<0.133	<0.023	0.2	0.125	0.436	0.079	0.78	0.223	<0.072	<0.0097	3.1	<0.00	<0.00
WS-1-41		<0.77	648.65	386319	1.95	<4.70	<0.158	<2.88	2282.86	2349.78	<1.05	<0.096	596.39	6.88	<1.72	<0.0238	3.49	<0.027	0.093	0.029	0.07	<0.042	0.081	<0.20	0.067	0.427	0.123	0.63	0.111	1.02	0.213	<0.109	<0.0134	3.14	<0.00	<0.00
WS-1-42		<0.80	478.91	386319	7.1	<4.36	<0.144	<2.94	2187.91	1966.98	1.59	<0.090	470.97	29.59	<1.54	<0.0198	2.29	0.145	0.327	0.052	0.331	0.326	0.181	0.76	0.218	2.18	0.729	2.96	0.408	3.4	0.598	<0.068	<0.0061	1.83	<0.00	<0.00
WS-1-43		<0.77	641.76	386319	23.64	<4.38	0.144	<2.87	2289.52	2445.34	2.08	<0.082	640.93	47.06	<1.67	<0.0220	3.92	0.182	0.475	0.076	0.78	0.51	0.093	1.54	0.416	3.85	1.205	4.7	0.601	3.04	0.71	<0.055	<0.0201	3.18	<0.00	<0.00
WS-1-44		<0.72	635.01	386319	12.77	<4.23	<0.132	<2.54	2271.25	2381.48	<1.07	<0.077	533.77	7.73	<1.56	<0.0130	3.73	0.023	0.064	0.0162	<0.068	<0.069	0.135	0.223	0.069	0.571	0.196	0.77	0.16	1.46	0.432	<0.036	<0.0080	3.12	<0.00	<0.00
WS-1-45		<0.73	663.3	386319	13.39	<4.36	<0.136	<2.67	2265.13	2406.2	<1.07	<0.086	567.84	2.49	<1.56	<0.0136	3.93	<0.0152	<0.0160	<0.0129	<0.084	<0.072	0.065	<0.148	<0.024	<0.094	0.058	0.409	0.058	0.9	0.276	<0.066	0.0156	3.32	<0.00	0.0014
WS-1-46		<0.77	632.67	386319	1.89	<4.12	<0.144	<2.62	2313.4	2466.42	2.49	0.104	554.69	6.39	<1.61	<0.0174	3.91	0.049	0.091	0.0206	<0.106	<0.062	0.1	<0.132	0.026	0.394	0.18	0.78	0.165	1.31	0.279	<0.040	<0.0175	3.05	<0.00	0.0014
WS-1-47		<0.73	635.71	386319	17.34	5.61	0.233	<2.60	2299.39	2416.35	1.92	<0.087	553.73	3.68	<1.53	<0.0184	4.67	<0.025	0.028	<0.0134	<0.068	<0.069	0.065	<0.186	0.032	0.298	0.034	0.454	0.062	0.72	0.261	<0.037	<0.0080	3.38	<0.00	<0.00
WS-1-48		<0.76	649.97	386319	24.06	<4.68	0.281	<2.79	2365.4	2396.49	1.97	<0.091	543.54	140.4	<1.59	<0.0172	3.86	0.504	1.311	0.33	2.28	1.5	0.363	5.33	1.518	13.49	3.85	12.06	1.737	11.48	1.537	0.028	<0.0212	3.03	<0.00	<0.00
WS-1-49		<0.70	624.15	386319	10.88	<4.37	<0.133	<2.77	2361.4	2460.51	1.9	<0.076	543.6	13.24	<1.49	<0.0249	3.97	0.057	0.073	0.029	0.281	0.151	0.097	0.55	0.111	1.04	0.376	1.41	0.219	1.8	0.359	0.04	<0.0116	3.23	<0.00	<0.00
WS-1-50		<0.74	646.32	386319	2.13	<4.18	<0.137	<2.59	2308.47	2336.84	1.39	<0.082	541.5	2.35	<1.55	0.02	2.94	<0.025	<0.028	<0.0106	<0.046	0.014	0.049	<0.119	<0.020	0.215	0.05	0.424	0.071	0.75	0.241	<0.038	<0.0169	3.04	<0.00	<0.00
WS-1-51		<0.83	660.22	386319	25.56	<4.57	<0.143	3.24	2296.17	2429.05	1.69	<0.085	541.31	125.64	<1.77	<0.028	3.79	0.437	1.231	0.264	2.08	1.68	0.554	5.32	1.385	12.57	4.26	13.19	1.513	8.87	1.359	<0.057	<0.0124	3.16	<0.00	<0.00
WS-1-52		<0.72	659.85	386319	0.86	<4.43	<0.147	<2.67	2284.1	2485.67	<1.02	<0.090	543.33	3.06	<1.57	<0.019	3.37	<0.023	0.032	<0.0164	<0.083	<0.058	<0.034	<0.116	<0.022	0.112	0.082	0.462	0.063	1.16	0.291	<0.065	0.0087	3.04	<0.0114	<0.00
WS-1-53		<0.70	647.46	386319	7.37	<4.11	<0.136	<2.74	2296.9	2481.54	1.89	<0.080	535.84	4.47	<1.62	<0.032	4.02	<0.0206	0.025	<0.0101	<0.092	<0.080	0.069	<0.171	0.025	0.372	0.105	0.508	0.076	0.91	0.27	<0.052	<0.0080	3.11	0.0087	0.0029
WS-1-54		<0.72	667.95	386319	5.52	<4.08	<0.133	<3.00	2300.93	2438.77	2.04	<0.083	547.59	3.15	<1.58	<0.0095	3.37	0.026	<0.0190	<0.0105	<0.095	<0.083	0.089	<0.147	<0.024	0.147	0.087	0.385	0.099	0.77	0.208	<0.066	<0.0155	2.94	<0.00	<0.00
WS-1-55		<0.69	588.95	386319	11.57	<4.66	<0.131	3.52	2301.35	2240.54	1.18	<0.086	498.26	11.14	<1.59	0.0111	2.73	<0.028	0.086	0.0174	<0.099	<0.071	0.064	0.54	0.083	1.11	0.411	1.13	0.261	2.53	0.455	<0.065	<0.0174	2.74	<0.00	0.0015
WS-1-56		<0.76	627.35	386319	2.52	<4.14	<0.144	<2.71	2313.13	2234.87	<1.11	<0.087	477.06	8.91	<1.50	<0.0252	2.89	0.121	0.179	0.029	0.194	0.131	0.069	0.34	0.063	0.72	0.312	1.07	0.145	1.12	0.274	<0.107	<0.0083	2.67	<0.00	0.0074
WS-1-57		<0.74	271.24	386319	11.73	<4.10	<0.146	<6.99	1545.17	938.4	1.07	<0.091	371.83	5.19	<1.56	<0.022	1.39	0.057	0.084	0.0213	<0.079	<0.042	0.055	<0.169	0.03	0.259	0.131	0.69	0.083	0.84	0.244	<0.055	0.0183	0.923	<0.00	0.0041
WS-1-58		<0.75	619.28	386319	0.8	<4.28	<0.151	<2.69	2253.92	2314.81	<1.12	<0.083	498.67	2.39	<1.65	<0.0262	3.44	<0.026	0.022	<0.0121	<0.080	0.046	0.073	<0.165	0.029	0.269	0.056	0.268	0.069	0.66	0.216	<0.056	<0.0149	2.96	0.003	<0.00
WS-1-59		<0.76	600.7	386319	36.62	<4.38	<0.143	<2.72	2311.9	2250.68	1.6	<0.080	504.57	81.65	<1.58	<0.025	3.23	0.206	0.599	0.082	0.62	0.51	0.116	3.46	0.927	7.05	2.47	7.92	0.88	8.71	1.048	<0.066	<0.0157	2.8	<0.00	<0.00
WS-1-60		<0.81	611.18	386319	2.33	6.34	<0.138	<2.92	2302.26	2355.96	<1.12	<0.086	502.1	10.57	<1.65	<0.014	2.57	0.034	0.049	0.0159	0.139	<0.109	0.134	0.41	0.108	0.83	0.248	1.14	0.214	1.73	0.407	<0.057	0.012	2.77	<0.00	0.0031
WS-1-61		<0.72	587.46	386319	1.9	<4.59	<0.148	<2.69	2191.83	2149.27	<1.02	<0.089	467.58	6.26	<1.65	<0.023	2.33	0.062	0.092	<0.0148	0.131	<0.083	0.042	0.159	0.038	0.62	0.158	0.74	0.112	1.14	0.28	<0.038	<0.0102	2.24	<0.00	0.006
WS-1-62		<0.81	629.41	386319	18.43	<4.37	0.199	<2.75	2411.38	2482.53	1.23	<0.089	539.8	8.91	<1.65	<0.0236	3.97	<0.022	0.034	0.0233	<0.101	<0.084	0.074	0.25	0.115	0.78	0.247	1.16	0.173	1.29	0.318	<0.094	<0.0103	2.94	<0.00	<0.00
WS-1-63		<0.70	608.92	386319	12.35	<4.24	<0.133	<2.59	2273.68	2343.1	<1.09	<0.084	529.73	92.86	<1.60	<0.030	3.01	0.264	0.827	0.141	1.28	0.83	0.264	3	1.023	8.02	2.48	8.94	1.189	6.36	0.885	<0.00	<0.0129	3.01	<0.00	<0.00
WS-1-64		<0.74	599.56	386319	12.7	8.57	0.147	<2.45	2237.09	2350.49	1.94	0.129	565.44	7.3	<1.61	<0.0226	4.48	<0.023	<0.028	<0.0196	0.223	0.064	0.124	0.26	0.077	0.65	0.238	0.92	0.114	1.37	0.358	<0.097	<0.0114	3.05	0.0088	<0.00
WS-1-65		<0.79	643.25	386319	9.06	<4.43	<0.129	<2.88	2316.11	2424.53	2	<0.079	580.52	61.44	<1.63	<0.017	4.13	0.201	0.599	0.12	0.68	0.66	0.247	2.81	0.655	6.41	1.85	6.22	0.873	4.89	0.841	<0.068	<0.0182	3.17	<0.00	<0.00
Mean		#DIV/0!	636.655	386319	11.2223	5.7375	0.3147	3.71571	2267.57	2414.98	1.72833	0.107333	557.974	28.5445	#DIV/0!	0.0153	3.96281	0.179029	0.370857	0.101977	0.776	0.562344	0.161726	2.22513	0.408222	3.1313	0.8336	2.97234	0.400015	2.8225	0.522328	0.0362857	0.012	3.16177	0.00568571	0.00300909
RSD(%)		#DIV/0!	8.62562	3.03638e-06	74.7021	23.9981	173.926	10.0852	4.49984	9.25028	23.2215	18.8266	7.44476	158.491	#DIV/0!	41.1713	25.1508	91.3771	135.44	107.846	100.493	104.179	79.0775	92.6484	126.882	150.357	159.36	153.641	137.834	113.645	81.4609	44.7135	36.1594	13.2391	64.8089	68.7756
2SD		#DIV/0!	109.831	0.0234603	16.7666	2.75378	1.09469	0.749476	204.074	446.785	0.802691	0.0404145	83.0797	90.4807	#DIV/0!	0.0125984	1.99336	0.327184	1.00458	0.219956	1.55965	1.17169	0.255778	4.12308	1.03592	9.41627	2.65686	9.13345	1.10271	6.41525	0.850986	0.0324492	0.00867825	0.837179	0.00736969	0.00413904
Name		Li7	Mg25	Ca43	Sc45	Ti49	V51	Cr53	Mn55	Fe57	Zn66	Rb85	Sr88	Y89	Zr91	Nb93	Ba137	La139	Ce140	Pr141	Nd146	Sm149	Eu151	Gd157	Tb159	Dy163	Ho165	Er167	Tm169	Yb173	Lu175	Hf179	Ta181	Pb208	Th232	U238
BZS-1		0	7.64024	400235	0.0731442	1.99679	0.0158115	2.20201	106.197	7.95521	0.168811	0	325.74	3.86787	0	0	0.105896	2.19668	5.63535	0.864192	3.99022	1.04384	0.140571	0.90629	0.149967	0.577505	0.0778194	0.229626	0.0428335	0.156076	0.0395436	0	0.00162248	0.00980029	0.00646951	0
BZS-2		0	3.23284	400235	0.0246646	3.28828	0	0	114.59	11.6643	0.383943	0.031402	327.628	4.89623	0.00294323	0	0	1.82967	5.07955	0.897322	3.63752	1.22311	0.209776	0.932147	0.105908	0.852387	0.127538	0.378838	0.0555478	0.240147	0.0358713	0.00615402	0	0	0.0108927	0
BZS-3		0	3.32282	400235	0	2.20091	0	1.52822	113.622	10.6771	0	0.00480952	334.99	4.99013	0.00321707	0	0.0437571	2.03012	5.55764	0.948581	4.05274	1.1013	0.179513	0.976012	0.129045	0.771016	0.124564	0.368132	0.0529864	0.273897	0.0329423	0	0.00189213	0.0154334	0.0087193	0
BZS-4		0	8.44011	400235	0.182112	2.27633	0	0	110.655	23.7871	0.20072	0.00286329	329.968	4.68134	0.0206724	0	0	2.2009	5.93248	0.912205	4.37135	1.07581	0.160895	0.965476	0.118788	0.684763	0.154515	0.26341	0.0608912	0.324482	0.0426722	0	0.00162269	0.00521457	0.0114238	0
BZS-5		0	7.34748	400235	0.094351	1.02983	0.0388824	0	112.308	5.32921	0.293866	0	328.826	4.30922	0	0	0.0418395	2.09067	5.4518	0.84434	4.04223	1.3284	0.167036	0.99978	0.113077	0.66295	0.134327	0.322259	0.0296985	0.256931	0.0372027	0	0	0.00520031	0.00981964	0
BZS-6		0	6.57606	400235	0.119801	2.92512	0.0355861	3.05706	116.864	20.0816	0.161704	0	340.321	5.06416	0	0.00223339	0.0243169	1.91916	5.28188	0.830142	3.91071	1.20389	0.151662	0.998564	0.150232	0.708632	0.122761	0.37383	0.0460234	0.272269	0.0341025	0	0.000518044	0	0.0124084	0.000388842
BZS-7		0	2.62451	400235	0.0926384	1.88412	0.0263608	0.955644	114.747	28.4646	0.45627	0	333.553	5.1256	0	0.00145927	0	1.9425	5.45569	0.785275	3.89458	1.15969	0.13637	1.01738	0.136298	0.684036	0.1251	0.403372	0.0374619	0.279296	0.0406228	0.0120981	0	0.0108465	0.0106956	0
BZS-8		0	7.11395	400235	0	4.2537	0.0788908	3.86227	110.889	21.206	0.61	0.028584	334.835	4.811	0.0117939	0.000804729	0.144385	2.24684	5.86564	1.00327	4.34933	1.19106	0.175314	1.06519	0.130385	0.655436	0.141397	0.344875	0.0352111	0.294087	0.0406644	0	0.000943167	0.0162364	0.0101357	0
BZS-9		0	12.3516	400235	0.163302	1.61433	0	0	122.646	7.36837	0.310419	0.0379342	257.54	4.07956	0	0	0	2.00823	5.59984	0.90972	4.20979	1.17683	0.162818	1.04142	0.124705	0.643501	0.0923179	0.297509	0.0329481	0.32112	0.0426826	0	0	0	0.0131609	0
BZS-10		0	10.7454	400235	0.221888	3.58937	0.000556204	4.31422	111.437	6.80544	0.356486	0.00647677	330.055	4.76594	0.031459	0	0.159353	2.31553	6.32061	1.00349	4.18435	1.18143	0.192849	1.10699	0.132751	0.620852	0.0956545	0.316178	0.0363867	0.230441	0.042197	0	0	0	0.00914105	0
BZS-11		0	7.14944	400235	0.24671	1.21766	0	1.55432	119.491	9.52483	0.27788	0.04028	264.905	4.13581	0	0.00280534	0.116715	2.01103	5.41914	0.908882	3.92799	1.16232	0.150541	0.883222	0.107213	0.612278	0.116837	0.309335	0.0367613	0.259753	0.0356762	0.00652509	0	0.00481114	0.0125977	0
BZS-12		0	4.3274	400235	0.177878	2.97411	0	1.50072	125.663	18.5605	0.0579279	0	235.299	4.11139	0	0	0.0714418	1.78192	5.30279	0.908254	4.05721	0.963673	0.17616	1.10492	0.104072	0.63658	0.0981067	0.336881	0.0451231	0.221988	0.0389053	0	0	0.016736	0.0102202	0
BZS-13		0.253104	10.5833	400235	0.172745	3.26026	0	2.09892	111.753	16.7651	0.590296	0	305.697	4.46328	0	0	0.225126	2.37238	5.96761	0.926698	3.97027	1.03648	0.142609	1.00309	0.0964875	0.67464	0.131099	0.27281	0.0351799	0.335914	0.0414631	0	0.00293441	0.0111799	0.0145752	0
BZS-14		0.257034	9.22509	400235	0.163307	2.51461	0	0.0107167	114.8	9.12132	0.126868	0	288.348	4.12062	0	0	0	2.08581	5.69035	0.888215	4.47824	1.15444	0.131411	0.86968	0.120695	0.550038	0	0.257029	0.0393485	0.276641	0.0360099	0	0.00196881	0.00926872	0.00758106	0
BZS-15		0	7.51358	400235	0.0794829	3.94345	0	2.79989	118.152	23.5195	0.217344	1.76034	306.483	4.81112	0.00870843	0	0.00973389	1.85675	5.45858	0.835651	4.22636	1.14869	0.161173	1.09587	0.157747	0.689032	0.136569	0.304054	0.0425148	0.221813	0.0441169	0	0.00205812	0	0.0158606	0
BZS-16		0	7.27335	400235	0.162041	3.32626	0	1.7399	113.541	12.5348	0.241402	0	319.329	4.89009	0.00399229	0	0.145725	1.94541	5.45711	0.855848	4.04692	0.985869	0.154774	1.13195	0.135205	0.700995	0.12785	0.320821	0.053709	0.232246	0.0441173	0	0.00393914	0.0178323	0.0176728	0
BZS-17		0	7.30822	400235	0.0520625	2.26484	0	0	134.088	17.0329	0.246568	0	174.613	4.49541	0	0	0.206135	0.845964	2.58207	0.449034	2.14576	0.53717	0.0985767	0.524966	0.119968	0.595047	0.113421	0.390302	0.0438364	0.270483	0.0312222	0	0	0	0.0131902	0
BZS-18		0.468115	9.11995	400235	0.12539	0	0	2.29479	112.46	14.6991	0.41892	0	320.96	4.53831	0	0.00162602	0.0405312	2.23387	5.84372	0.900861	4.20528	0.999076	0.165714	1.05367	0.110465	0.648189	0.117864	0.30074	0.0320526	0.334259	0.0473746	0	0	0.00118943	0.0140846	0
BZS-19		0	5.31589	400235	0.305601	0.764197	0.00851787	0	130.899	13.7413	0.245736	0	215.548	4.14486	0	0.00151586	0	1.5057	4.12805	0.675004	3.18629	0.736774	0.133876	0.8563	0.118335	0.643879	0.107302	0.291984	0.0340926	0.201818	0.0482632	0	0.0039395	0.023797	0.0121184	0
BZS-20		0	10.9525	400235	0.19313	2.53721	0	3.49016	112.469	3.68816	0.0603569	0.0004831	319.444	4.63993	0.0208568	0.00466315	0	2.22236	5.54117	0.918068	4.07899	1.07618	0.151029	0.935671	0.104675	0.518068	0.12728	0.359257	0.059175	0.229489	0.0486487	0	0	0.0052013	0.014507	0.0008411
BZS-21		0	6.79236	400235	0	0	0	3.26971	117.03	10.303	0.136608	0	276.163	3.88806	0	0	0.0133555	2.04799	5.80225	0.908361	4.11693	1.06228	0.171072	0.992151	0.141206	0.728408	0.107643	0.299144	0.0365281	0.211464	0.0302583	0	0	0.00803166	0.0113659	0.000439796
BZS-22		0.510208	5.62094	400235	0.472689	4.22479	0.00291874	0.223582	117.582	10.7485	0.337334	0	307.635	4.72876	0.0356345	0.00154619	0.158758	1.74493	5.08711	0.824286	4.02409	0.93313	0.170018	1.2412	0.121335	0.769677	0.103007	0.359495	0.0497476	0.296875	0.0407783	0	0	0	0.0119117	0
BZS-23		0	8.34597	400235	0.0553488	2.65132	0	0.726907	115.648	20.2533	0.353606	1.77683e-05	284.853	4.00481	0.020352	0.00154421	0	2.24041	5.84505	0.937295	4.18627	1.20149	0.171115	0.929776	0.101816	0.645802	0.0857284	0.32917	0.0349277	0.341394	0.0435229	0.00642195	0	0.00812052	0.00984333	0
BZS-24		0	6.75913	400235	0.0954517	0.372609	0.0630075	0	118.386	10.5972	0.405718	0	280.509	4.12093	0	0.00300817	0.226498	2.10232	5.83927	0.970589	4.04638	0.975162	0.161583	0.88744	0.139565	0.653655	0.104493	0.320616	0.0357612	0.240618	0.0440239	0	0.00196483	0.0151756	0.0100799	0
BZS-25		0	7.67099	400235	0.068748	2.4417	0	0.439688	114.668	17.5705	0.12166	0	301.254	4.2796	0	0.00145735	0.0987638	2.11903	5.65074	0.913352	4.33898	1.15412	0.164994	0.958374	0.105649	0.733442	0.125753	0.274188	0.0514274	0.288303	0.0340628	0	0	0.0163996	0.0107355	0
BZS-26		0	8.46218	400235	0.247169	2.88522	0.00479357	4.1656	117.703	13.8066	0.152964	0.0281487	265.52	3.7719	0.0123103	0.00155797	0	2.44319	5.87057	0.931808	4.16614	0.957219	0.124039	0.828479	0.121862	0.604036	0.106466	0.229388	0.0307153	0.226589	0.0371659	0	0.000677067	0	0.0109773	0
BZS-27		0	7.63914	400235	0.193244	1.44448	0.0478218	0	116.467	12.1421	0.374001	0	272.516	3.89398	0	0.00145966	0.0361164	2.30751	5.92905	1.01001	4.25487	0.736533	0.19374	0.943108	0.115268	0.672525	0.108484	0.265788	0.0368259	0.195278	0.0364013	0	0	0	0.0107575	0
BZS-28		0	15.0133	400235	0.105568	1.82686	0.0348598	0	120.446	25.1701	0.371014	0.0292628	273.235	3.60692	0.0356291	0	0.12034	1.95504	5.46059	0.890969	4.18961	1.20717	0.173129	0.868209	0.109108	0.551734	0.148491	0.266786	0.0285185	0.275579	0.0470978	0	0.00106878	0.00646643	0.00823805	0
BZS-29		0	11.5458	400235	0	2.79927	0	2.14742	121.867	10.1918	0.424789	0	272.64	4.30545	0.0040848	0	0.0953955	2.20852	5.72295	0.907084	3.97191	1.16932	0.153637	1.10426	0.123092	0.60096	0.130508	0.265732	0.0325234	0.285642	0.0464776	0	0	0.0109447	0.0123809	0
BZS-30		0	11.3024	400235	0.073506	0	0	1.96027	120.976	10.9885	0.435156	0	266.5	4.38816	0.00178603	0	0.17264	1.98599	5.29233	0.882761	4.29252	1.06368	0.132915	1.0629	0.144907	0.63342	0.12663	0.246189	0.0510269	0.260578	0.0423834	0	0.00319008	0.00167428	0.00926841	0
BZS-31		0	9.16349	400235	0.136553	3.23612	0	1.55502	124.914	20.0305	0.305718	0.00444319	245.151	4.3999	0.00450601	0	0	1.3537	3.93631	0.61487	3.16242	0.816176	0.115133	0.935325	0.112071	0.627459	0.108491	0.329856	0.0282056	0.224091	0.0556184	0.0122135	0.00191413	0.0107693	0.0102985	0
BZS-32		0	10.7573	400235	0	1.70473	0.018066	1.75648	116.166	26.7303	0.270662	0.00441332	316.432	4.63375	0.000321277	0.000809362	0.165587	2.1679	5.68753	0.930591	4.37536	1.06795	0.19265	0.982667	0.0961936	0.757195	0.130722	0.334931	0.0436609	0.293756	0.0515453	0	0.000955339	0	0.0151784	0
BZS-33		0	13.4279	400235	0.0634907	1.9959	0	3.15627	114.64	20.8738	0.395005	0.0164037	314.732	4.452	0	0.00102672	0.147167	2.08048	5.58032	0.887788	4.01583	1.0404	0.170445	0.903114	0.129713	0.792988	0.105982	0.190846	0.0376503	0.241573	0.0380559	0	0.00401974	0.0101599	0.0164632	0
BZS-34		0	3.85227	400235	0.221427	1.02777	0.0322947	3.33053	122.584	17.7294	0.490514	0	262.132	4.26095	0.0293181	0	0.0679245	1.75532	4.92919	0.801661	3.95941	0.937765	0.13426	1.09446	0.116887	0.674191	0.103141	0.297933	0.0370556	0.288111	0.0497414	0	0.00297695	0	0.0115051	0
BZS-35		0	8.34674	400235	0.109853	3.67321	0	1.62523	125.906	10.119	0.183311	0	270.918	4.54073	0.0274134	0	0.149785	1.54655	4.52582	0.720194	3.21295	1.20932	0.125302	0.863171	0.108369	0.559255	0.130309	0.261939	0.0315464	0.264944	0.0412616	0.00637487	0	0.000684406	0.018477	0
BZS-36		0	9.74304	400235	0.0420041	2.29534	0.026507	2.41943	135.646	33.1602	0.390714	0	220.79	4.36005	0	0	0.0334979	1.16454	3.71219	0.615119	2.92262	0.755928	0.100615	0.758669	0.104336	0.692393	0.12246	0.333454	0.0502136	0.222484	0.0366513	0	0.00204059	8.19808e-06	0.0156985	0
BZS-37		0	8.30208	400235	0.105888	0	0	1.07674	112.62	26.5698	0.0892345	0.00497015	307.578	4.36526	0	0	0.0435306	2.29796	5.81479	0.925682	4.09782	1.09007	0.208649	1.05331	0.130884	0.61105	0.118652	0.305931	0.0353524	0.264366	0.0355721	0	0.00214959	0.00942921	0.00658181	0.00227022
BZS-38		0	10.4915	400235	0.00860714	3.65181	0	0	129.746	23.877	0.0298826	0.0180174	223.672	3.77737	0.00164785	0	0.164208	1.73261	4.51185	0.663761	3.19905	0.78532	0.107832	0.786418	0.101006	0.524993	0.119718	0.266823	0.0389497	0.26682	0.0477428	0	0.00151862	0	0.0150159	0
BZS-39		0	7.98896	400235	0.280829	4.10252	0.0165527	1.27429	115.656	20.0561	0.616004	0.0130307	285.508	4.40091	0.0267211	0.00155141	0.0821349	2.47412	6.03855	0.95904	4.13325	1.15154	0.156763	0.695123	0.121522	0.622532	0.113704	0.264873	0.0471752	0.25881	0.0350082	0	0	0.0164239	0.0082821	0
BZS-40		0	6.24572	400235	0.00680703	2.35192	0	1.46305	119.352	22.2356	0.203467	0.0148621	317.49	4.71894	0.021695	0.00666717	0.0642564	1.808	5.23953	0.855893	4.13508	0.935552	0.134478	1.04975	0.107002	0.721249	0.131852	0.335702	0.0621693	0.297038	0.0423394	0	0.0010866	0.0193392	0.0161361	0
BZS-41		0	5.76986	400235	0.135643	1.67285	0.0530372	1.30101	116.092	14.0499	0.254019	0	298.158	4.34991	0.0151697	0	0	2.14983	5.87092	0.953846	4.31677	1.21746	0.198184	1.19436	0.140941	0.728957	0.111885	0.379641	0.0370024	0.244522	0.0324016	0	0.00194918	0.000219268	0.00597501	0
BZS-42		0	10.9722	400235	0.196198	2.04597	0.053841	0	120.916	21.8802	0	0	311.055	4.69354	0.00768594	0	0.0509715	1.75705	5.07536	0.86558	4.07993	1.04626	0.148443	0.967007	0.131432	0.651657	0.144447	0.38763	0.0433723	0.287872	0.0557025	0	0	0.00422489	0.0187284	0
BZS-43		0.0010045	13.1955	400235	0.258113	1.62515	0	4.16893	125.694	20.0362	0.472116	0	242.348	4.04425	0.0121506	0.00324428	0.17338	2.11699	5.46626	0.856632	4.2759	0.97767	0.158188	1.00514	0.13923	0.63381	0.114525	0.263873	0.045007	0.336484	0.0306737	0	0.00422998	0	0.0141062	0
BZS-44		0	8.23797	400235	0.223201	3.2812	0.0804717	0	123.367	9.42498	0.0491831	0.0122016	280.233	4.1113	0.00200166	0.00151551	0.0250188	1.68985	4.97978	0.816519	3.68395	0.991904	0.155455	0.864865	0.122403	0.610827	0.10058	0.315903	0.0551313	0.17084	0.033612	0	0	0	0.0157603	0.000833938
BZS-45		0	10.2945	400235	0.0232536	3.7501	0	1.83647	122.523	16.1779	0.446775	0	291.838	4.58423	0.00918291	0.00618625	0.0894893	1.83663	5.38527	0.908918	3.94605	0.970812	0.136212	1.03526	0.11368	0.803609	0.134109	0.340024	0.0263253	0.378477	0.040122	0	0.00405795	0.0184629	0.0113888	0
BZS-46		0	9.68057	400235	0.131738	3.7518	0.0716715	0	115.548	22.526	0	0.00560757	289.79	4.29711	0	0	0.0280287	2.06714	5.58359	0.908768	3.9933	0.991065	0.138804	0.961092	0.117328	0.633412	0.131746	0.274838	0.0384453	0.27536	0.0425424	0	0.000533252	0.00686063	0.0121598	0
BZS-47		0	10.2167	400235	0.0866794	2.75817	0.0108381	0.602656	124.507	19.1939	0.090127	1.30737	265.298	4.00473	0	0.00317032	0	2.10761		0.864373	4.13883	1.08657	0.138787	1.02476	0.12249	0.617076	0.129248	0.293164	0.0342567	0.262936	0.0433797	0	0.0017337	0	0.0132459	0
BZS-48		0	7.40731	400235	0.164154	1.53318	0	1.69107	120.652	7.14256	0.212983	0	280.085	4.62798	0.00409834	0.00259041	0.0818412	2.22558	5.75254	0.884457	4.08599	1.01246	0.170491	1.05512	0.12017	0.729143	0.126382	0.232872	0.0303725	0.234552	0.0616751	0	0.00304409	0	0.0124457	0
BZS-49		0	7.58837	400235	0.0339586	1.91079	0	0	126.593	25.4252	0	0.0353747	261.486	4.3677	0.00371726	0.00378608	0	1.69439	4.93759	0.790552	3.7546	0.982817	0.137857	0.942443	0.0993133	0.636383	0.122032	0.263567	0.0366689	0.294641	0.0402928	0	0.00443089	0.0209834	0.0146281	0
BZS-50		0	12.8546	400235	0.138956	2.36153	0.0343568	1.7055	129.095	23.7181	0.277133	0	267.939	4.21836	0.0112962	0.0030333	0	1.84248	5.18245	0.843151	4.13611	1.10098	0.130997	0.943542	0.115215	0.686607	0.100858	0.310643	0.0405589	0.311533	0.0408119	0	0	0.0183287	0.0166096	0
BZS-51		0	15.0739	400235	0.0586592	0.731935	0.0664118	1.79884	123.203	23.3602	0.180416	0	300.627	4.52335	0.0161386	0.00295042	0.0818343	1.90145	5.22582	0.888313	3.75317	1.16405	0.14019	0.956651	0.135452	0.691072	0.118419	0.340569	0.0530196	0.193863	0.0290145	0	0	0	0.0157596	0
BZS-52		0	8.9668	400235	0.113663	0.165141	0.140233	0.80594	129.716	28.6568	0.0592891	0	249.809	4.19108	0.0222852	0	0.0825013	1.61264	4.82265	0.766323	3.78322	0.898641	0.111994	0.853205	0.112198	0.671132	0.125367	0.26852	0.0449068	0.271021	0.0490178	0.0112123	0	0.00465374	0.0146136	0
BZS-53		0	11.486	400235	0.126625	0.910559	0.0255058	0.979322	126.561	17.8113	0	0	275.357	4.37541	0.00459425	0	0.0139922	1.69931	5.01773	0.815404	4.01664	0.898805	0.163972	1.06644	0.122784	0.631123	0.121333	0.321924	0.0582524	0.290202	0.0461732	0	0	0.0114798	0.0172191	0
BZS-54		0.17416	8.10362	400235	0.08427	0	0	1.99469	121.714	18.7775	0.0393107	0	307.683	4.80018	0	0.00423968	0.178945	1.88497	5.27744	0.860076	3.79966	1.05137	0.141717	1.00516	0.131859	0.617534	0.119527	0.347413	0.0614354	0.309709	0.0453488	0	0	0.00581524	0.00990678	0
BZS-55		0	6.1221	400235	0.0782791	1.08	0.0528036	1.84491	122.142	20.4513	0.362953	0	282.45	4.69243	0.0102546	0	0.0472767	2.18407	5.84188	0.938992	4.06059	1.1396	0.110746	0.947735	0.122607	0.580333	0.134096	0.264354	0.034413	0.296925	0.0389457	0	0	0.0210563	0.0184786	0
BZS-56		0	9.75729	400235	0.116657	3.62353	0	0.391607	123.372	14.6219	0.264045	0	273.627	4.25747	0	0.00131871	0	2.13694	5.82225	0.927595	4.07521	1.08694	0.156294	0.848365	0.124787	0.533743	0.107886	0.271888	0.0288669	0.236541	0.0383269	0	0.000461196	0.0091383	0.0088366	0
BZS-57		0	3.16555	400235	0.118129	2.34865	0	3.30472	124.767	18.7443	0.251233	0	273.371	4.10641	0	0.000723833	0	2.1049	5.3387	0.906835	3.78382	0.940449	0.137267	0.877614	0.102717	0.585085	0.105518	0.293082	0.0543718	0.280441	0.0598675	0	0.000820199	0	0.0111617	0.000352773
BZS-58		0	6.89933	400235	0	0.774088	0	2.43985	121.312	20.41	0.0986914	0.0353569	286.226	4.23412	0	0.0014658	0	1.94254	5.19737	0.793219	3.92347	1.06473	0.165809	0.94642	0.127693	0.648964	0.127197	0.31328	0.0283786	0.245822	0.0436149	0	0	0	0.015228	0
BZS-59		0.1191	6.06865	400235	0.0568256	1.39751	0	0.0493709	120.961	18.7539	0.0358022	0.0110777	270.69	4.09575	0	0.00147183	0	2.27188	5.91595	0.891838	4.32199	1.03562	0.143051	0.945396	0.10277	0.446766	0.137451	0.253786	0.0204973	0.18995	0.0345763	0.0117982	0.00350764	0.000218402	0.0162789	0
BZS-60		0.373441	8.19425	400235	0.0773204	1.7827	0	0	122.465	17.9937	0	0.0297341	300.057	4.59528	0.0127335	0.00297158	0.0405342	1.72089	4.9268	0.847168	3.90582	1.13326	0.149133	1.28594	0.142573	0.690708	0.128902	0.373281	0.0412765	0.286984	0.0292937	0	0	0.00287922	0.0194311	0
BZS-61		0	10.4367	400235	0.263081	2.02469	0	1.33834	122.169	26.0815	0.000107511	0.0224403	287.926	4.28018	0	0.00276018	0.0160498	2.1253	5.628	0.89865	3.96296	1.13413	0.185193	0.981651	0.107435	0.589228	0.12736	0.356981	0.0472618	0.247491	0.0343399	0	0.000868791	0.00114454	0.0180534	0
BZS-62		0	7.67892	400235	0.278888	1.10525	0	2.02047	123.009	7.59585	0.228247	0	283.951	4.33631	0	0.00403953	0.0861381	2.06861	5.72158	0.876451	3.84348	1.16144	0.155497	0.887455	0.125382	0.685585	0.146386	0.343273	0.0464759	0.215479	0.0513209	0	0	0	0.0153607	0
BZS-63		0	6.94498	400235	0	1.8595	0.079015	2.15216	118.042	12.2364	0.322383	0	310.882	4.59174	0.0217612	0	0	1.87491	5.21375	0.863371	3.94404	1.10743	0.168073	0.897577	0.134345	0.739726	0.144646	0.295952	0.0362308	0.300999	0.043444	0	0.000903367	0.00359157	0.0120369	0
BZS-64		0	6.19379	400235	0.0393873	2.97514	0	0	119.415	20.1101	0.10376	0	292.376	4.23628	0	0	0.0519512	1.98956	5.64088	0.867055	3.9657	1.22143	0.182366	1.01393	0.101622	0.63575	0.105054	0.210533	0.0435572	0.195751	0.0299273	0	0.00186112	0	0.0109029	0
BZS-65		0	6.66439	400235	0.0639307	2.28304	0	1.9032	117.426	20.5642	0.312315	0.0316609	277.96	4.0389	0.0187654	0	0.0599624	2.20855	6.01727	0.940288	4.33186	1.16254	0.170177	0.961116	0.10704	0.639514	0.105241	0.263692	0.0331622	0.217374	0.0267264	0	0	0.0067354	0.0101195	0
BZS-66		0.250687	8.90146	400235	0.123923	1.71865	0	3.66502	118.367	24.145	0	0.0180489	284.509	4.1938	0.0212273	0	0.0231833	2.0233	5.43327	0.873656	3.99502	1.02324	0.165794	0.80631	0.111669	0.69494	0.0872474	0.230487	0.0378705	0.274511	0.0264619	0	0	0	0.00609497	0
BZS-67		0	7.90927	400235	0	2.09705	0	1.64263	122.833	22.1995	0.1123	0.015837	267.309	4.04583	0	0.00132878	0.0287021	2.01205	5.55117	0.923167	4.1705	1.12687	0.161027	0.969077	0.0846195	0.518988	0.119134	0.325356	0.0370279	0.285983	0.0414308	0	0.00757456	0	0.0150101	0.00024141
BZS-68		0	14.867	400235	0.12882	1.52273	0	1.55981	119.748	23.8598	0.129084	0.00802612	294.841	4.51358	0.00797596	0	0.0669082	2.01745	5.63737	0.93164	4.30083	1.07629	0.155083	1.15041	0.126298	0.702732	0.133208	0.264052	0.0303617	0.174826	0.0481099	0	0	0.0089072	0.00721996	0
BZS-69		0	9.55514	400235	0.0693702	1.34796	0	0.0646744	116.017	17.6029	0	0	309.128	4.65293	0.00554813	0.00421053	0.0580027	2.01147	5.81616	0.893349	4.20456	1.10121	0.178205	1.01433	0.114618	0.64133	0.125829	0.354193	0.0402848	0.282744	0.0488686	0.00559473	0	0.00348107	0.0079887	0
BZS-70		0	7.85092	400235	0.0380978	1.54299	0	0	115.957	24.1514	0.101867	0	309.321	4.47492	0.018351	0.00417389	0.0460221	2.25245	5.82318	0.960035	4.28629	1.08518	0.150815	1.01938	0.123023	0.619541	0.132817	0.262009	0.0336613	0.255927	0.0351849	0	0.0017636	0.0120652	0.00605088	0
BZS-71		0	8.25326	400235	0.114381	4.02675	0.0784793	3.31522	119.608	24.7146	0.21608	0	267.258	4.01075	0.0146024	0	0.0682884	2.08862	5.71815	0.914072	3.86101	0.928541	0.147404	1.07875	0.128539	0.565037	0.106573	0.35061	0.0314257	0.238416	0.0525037	0	0.00299702	0.00513281	0.0106904	0
BZS-72		0	10.2051	400235	0.0248414	1.99753	0.355726	4.41308	117.207	12.5622	0.302708	0.0326081	310.299	4.63524	0	0	0.0194454	2.07291	5.652	0.989147	4.3284	1.07434	0.144354	1.00428	0.108914	0.669245	0.129478	0.410197	0.0457	0.276124	0.0306633	0	0	0.00203087	0.00887236	0
BZS-73		0	7.26617	400235	0	2.40616	0.101235	2.40449	121.38	17.6699	0.191142	0.00445394	294.409	4.3809	0.00467989	0.00133582	0.0713669	2.01098	5.67785	0.948662	4.00886	1.16926	0.159524	0.788851	0.128679	0.687746	0.126418	0.286699	0.0400993	0.22479	0.0430398	0	0.000469423	0	0.0107358	0.000717202
BZS-74		0.270525	8.00976	400235	0.270394	1.14305	0	1.30133	118.865	19.9411	0.24378	0	283.59	4.22062	0	0	0.0453336	2.08788	5.53548	0.958102	4.12652	1.07155	0.127991	0.913372	0.115007	0.693793	0.119719	0.219708	0.0469141	0.200763	0.0423259	0	0.000836991	0	0.00532175	0
BZS-75		0	8.05726	400235	0	0	0	0	114.306	13.9936	0.466224	0	321.281	4.63975	0	0	0	1.88432	5.39324	0.869805	4.28801	1.00969	0.177992	1.05406	0.12997	0.656343	0.116474	0.37383	0.0286056	0.268077	0.0341135	0	0.00256386	0.0126245	0.0113177	0
BZS-76		0.337095	5.13095	400235	0.0297944	0.690094	0	2.08569	116.206	13.6773	0.296303	0	321.471	4.86539	0.0345883	0.00270124	0.112829	1.79615	4.86811	0.809906	3.89126	1.11476	0.187563	0.992716	0.159004	0.709215	0.152441	0.343539	0.0402874	0.303102	0.0493893	0	0	0.0145002	0.0177772	0.000367754
BZS-77		0	9.16615	400235	0.165723	2.5931	0	0.120116	119.739	14.9464	0.188878	0	278.628	4.13393	0.0028586	0.0158728	0	1.9541	5.51429	0.879036	4.10298	1.13894	0.18284	0.972781	0.122464	0.628355	0.104425	0.218386	0.0444295	0.324119	0.030425	0	0.00046684	0.0116823	0.0101319	0
BZS-78		0	6.49878	400235	0.0699297	0.118713	0.00323674	1.41656	118.728	31.4236	0.283736	0.0153373	284.753	3.91532	0.0009039	0.00276743	0	2.24813	5.81546	0.907616	4.36558	1.00745	0.161002	0.869642	0.11801	0.493124	0.102928	0.213568	0.0458601	0.258183	0.0395095	0	0.00264876	0.00405649	0.00607092	0
BZS-79		0	8.38943	400235	0.18859	1.70334	0	2.61347	118.564	20.0882	0	0	293.418	4.42534	0	0.00400516	0	1.88771	5.18413	0.890368	4.16887	0.900941	0.175815	0.964806	0.12449	0.56502	0.131687	0.415651	0.0442159	0.247468	0.0334708	0.00535704	0	0	0.0115243	0
BZS-80		0	9.89137	400235	0.0294921	2.25619	0	0	117.507	15.3097	0.18645	0	293.665	4.29299	0.0150978	0.0106292	0.082515	1.8045	5.19309	0.831616	4.09021	1.07081	0.174915	0.955137	0.104113	0.734718	0.119414	0.271976	0.034931	0.266097	0.0353375	0	0	0.0084954	0.00984694	0
BZS-81		0	5.60298	400235	0.155012	1.67851	0	0	109.22	21.8088	0.335226	0	304.214	3.9256	0.00651152	0	0	2.40247	5.93673	0.95938	4.4091	1.03956	0.135443	0.93289	0.106845	0.581276	0.10139	0.338701	0.0372813	0.228701	0.0322916	0	0	0	0.00667428	0
BZS-82		0	9.84196	400235	0.0386704	0.335778	0	0	121.167	25.3464	0.299512	0	290.786	4.49422	0.0139982	0	0.0782187	1.7277	5.00211	0.832247	4.00395	0.920635	0.160122	1.01325	0.120152	0.687782	0.136673	0.291431	0.0442777	0.269305	0.0319363	0.00570508	0	0.00891651	0.0172789	0
BZS-83		0	10.7714	400235	0.0263176	1.25402	0	0.259098	117.793	16.1362	0.109277	0	311.907	4.7519	0.0036878	0	0	1.81608	5.20999	0.836345	4.18211	1.10997	0.18107	0.935193	0.140315	0.76727	0.115593	0.281945	0.0404809	0.316223	0.0417335	0	0.000293374	0.0140636	0.018948	0.000767111
Mean		0.0363189	8.43105	400235	0.111788	2.00882	0.0199794	1.43602	119.395	17.7229	0.229353	0.0437576	288.45	4.3743	0.00779432	0.00154492	0.0600439	1.98181	5.40062	0.872274	4.00524	1.05161	0.155746	0.96759	0.120578	0.651096	0.118508	0.304254	0.0406593	0.262031	0.0404573	0.00107777	0.00112068	0.00636292	0.0121742	8.69897e-05
2SD		0.213419	5.20553	7.02738e-10	0.181258	2.27929	0.0942434	2.57745	10.9973	12.7393	0.315891	0.476977	60.0484	0.639425	0.0201941	0.00496489	0.124347	0.539745	1.11849	0.179613	0.710224	0.260511	0.0469569	0.227134	0.0293928	0.14532	0.040478	0.101516	0.0179039	0.0853492	0.0148948	0.0059219	0.00299496	0.0134097	0.00723092	0.000612637
RSD(%)		293.812	30.8712	8.77906e-14	81.0723	56.7321	235.851	89.7431	4.60543	35.9403	68.8655	545.022	10.4088	7.30888	129.544	160.684	103.546	13.6175	10.3552	10.2957	8.8662	12.3863	15.0749	11.7371	12.1883	11.1597	17.0781	16.6829	22.017	16.2861	18.4081	274.729	133.622	105.374	29.6977	352.132

## Sheet: Supplementary Table S4
Table S4 Trace elements compositions of BZS and WS-1calcites by ICP-MS(ppm)
Sample Name	25Mg	45Sc	47Ti	55Mn	59Co	60Ni	65Cu	66Zn	86Sr	89Y	90Zr	93Nb	133Cs	137Ba	139La	140Ce	141Pr	146Nd	147Sm	153Eu	157Gd	159Tb	163Dy	165Ho	166Er	169Tm	172Yb	175Lu	178Hf	208Pb	232Th	238U
BZS-1	54.7926	0.266294	-0.0450044	153.123	1.06877	8.34288	1.2158	0.135428	204.048	3.93164	-0.00246714	-0.00492977	0.00071268	0.171636	0.887938	2.7588	0.450657	2.1862	0.632609	0.0767284	0.644518	0.0952405	0.511513	0.100579	0.281208	0.0404923	0.29569	0.0478715	0.00310081	-0.0565261	0.031781	0.0029736
BZS-2	54.3191	0.273304	-0.0802779	152.578	1.09755	8.54929	1.24756	0.142852	204.329	3.91743	-0.00268403	-0.00647032	0.000867611	0.177051	0.880085	2.75068	0.452738	2.19362	0.615353	0.0774976	0.650582	0.0941758	0.502709	0.100429	0.274543	0.0401382	0.291499	0.0482447	0.00323648	-0.0560056	0.0227088	0.00282971
BZS-3	54.3238	0.289389	-0.0413551	153.682	1.11041	8.90071	1.25483	0.158785	203.741	3.9344	-0.00292803	-0.00770273	0.000568077	0.174222	0.873097	2.73667	0.445668	2.17185	0.625778	0.0772107	0.649708	0.0930801	0.49414	0.0991594	0.272867	0.0414549	0.291234	0.0472073	0.00313957	-0.0573591	0.0196907	0.002883
BZS-4	52.9697	0.284698	-0.0795104	159.885	1.18276	9.40803	1.26041	0.125295	212.904	4.07998	-0.00375852	-0.00975821	0.000779973	0.19427	0.895976	2.79646	0.450971	2.23122	0.63046	0.0806654	0.659247	0.0973612	0.512508	0.103555	0.276873	0.0419936	0.304112	0.0492109	0.00353859	-0.0556256	0.0194504	0.00300916
BZS-5	53.3882	0.287878	-0.0918509	163.356	1.21224	9.7554	1.32141	0.124887	215.458	4.0974	-0.00385019	-0.0100534	0.000582069	0.202103	0.897516	2.83353	0.460399	2.26272	0.633549	0.0792271	0.658902	0.0978714	0.517432	0.102867	0.28413	0.0434976	0.3068	0.0497491	0.00286145	-0.0550518	0.0187663	0.00320136
BZS-6	53.574	0.302039	-0.120641	164.14	1.20545	9.90936	1.34631	0.135702	218.136	4.14155	-0.00357518	-0.00920258	0.000663559	0.194816	0.912463	2.85045	0.459648	2.22763	0.637347	0.0783602	0.666847	0.098557	0.513965	0.102869	0.282187	0.04146	0.29966	0.0489264	0.0031891	-0.055104	0.0172207	0.00279893
BZS-7	47.4955	0.306993	-0.034549	167.468	1.23511	10.1485	1.36933	0.140901	215.85	4.10466	-0.0030259	0.0107233	0.00068119	0.177674	0.883382	2.77157	0.451097	2.18606	0.626228	0.0772912	0.650707	0.0949222	0.507928	0.103485	0.280311	0.0411489	0.297622	0.0487669	0.00298888	-0.0446753	0.0167912	0.00342806
BZS-8	47.9048	0.311804	0.180243	167.234	1.22407	10.2882	1.39564	0.142737	218.045	4.16745	-0.00335599	-0.00894086	0.000377273	0.176854	0.892668	2.791	0.456715	2.20028	0.622352	0.0778044	0.645245	0.0947123	0.508944	0.0995305	0.277573	0.0418351	0.305907	0.0489785	0.00302821	-0.0444288	0.0165574	0.00334154
BZS-9	48.125	0.319212	-0.0567687	169.807	1.26353	10.4467	1.39	0.128408	217.557	4.13387	-0.00327347	-0.00950356	0.000523992	0.177756	0.887617	2.78708	0.45024	2.19032	0.627094	0.0792382	0.661127	0.0958871	0.509264	0.0999744	0.277958	0.0421631	0.30163	0.0482267	0.00336249	-0.0459667	0.0171105	0.00310363
Mean	51.877	0.293512	-0.0410794	161.253	1.17776	9.52767	1.31125	0.137222	212.23	4.05649	-0.00321316	-0.00620424	0.000639603	0.182931	0.890082	2.78625	0.453126	2.20554	0.627863	0.0782248	0.654098	0.0957564	0.508711	0.101383	0.278628	0.0415759	0.29935	0.0485758	0.00316062	-0.0523048	0.0200086	0.00306322
2SD	6.15884	0.0355326	0.174941	13.4326	0.137147	1.54505	0.135949	0.0214268	12.698	0.19989	0.000951633	0.0131395	0.000291499	0.0219857	0.0228209	0.0747581	0.00967641	0.0579107	0.0131533	0.00253488	0.0154081	0.00364844	0.0136978	0.00356813	0.00731259	0.00196608	0.011627	0.00153327	0.000406653	0.0110427	0.00965066	0.000446707
Sample Name	25Mg	45Sc	47Ti	51V	59Co	60Ni	65Cu	66Zn	86Sr	89Y	90Zr	93Nb	133Cs	137Ba	139La	140Ce	141Pr	146Nd	147Sm	153Eu	157Gd	159Tb	163Dy	165Ho	166Er	169Tm	172Yb	175Lu	178Hf	208Pb	232Th	238U
WS-1-1	784.009	4.14141	0.55472	0.929061	1.19389	8.85885	1.21786	3.11649	594.493	13.2701	0.00993159	0.138661	0.0130554	4.14175	0.183458	0.314645	0.0456942	0.248653	0.122557	0.108267	0.372146	0.103131	1.03885	0.322237	1.23659	0.221371	1.90271	0.41872	0.00587527	3.1027	0.00418155	0.0214536
WS-1-2	780.897	4.3182	0.470894	0.885258	1.21519	9.71352	1.28508	3.05042	590.238	13.2212	0.0107447	0.0676906	0.0108053	4.1884	0.179662	0.301866	0.044078	0.242722	0.103149	0.110322	0.508609	0.104654	0.992452	0.323514	1.33878	0.22485	1.89514	0.400284	0.00639065	3.14731	0.00317012	0.0190399
WS-1-3	891.339	4.00366	0.292666	0.921614	1.27093	10.9688	1.41622	3.75088	626.472	12.9703	0.00899794	0.0686517	0.0120547	4.45017	0.179626	0.305818	0.0414835	0.237272	0.105899	0.106845	0.34568	0.10092	0.964498	0.31923	1.24109	0.220579	1.89353	0.410421	0.00694752	3.20733	0.00353845	0.0215824
WS-1-4	900.068	4.01919	0.34475	0.84565	1.28312	10.5747	1.38997	3.71797	620.959	12.9435	0.0106339	0.0627251	0.0114229	4.52027	0.180467	0.307456	0.0441745	0.23141	0.100574	0.112257	0.350808	0.101196	0.972556	0.318865	1.21482	0.220757	1.89708	0.404861	0.0071549	3.34316	0.00299173	0.0204283
WS-1-5	744.685	3.95928	0.342692	0.869172	1.16698	9.53922	1.16851	2.10366	585.013	13.962	0.00847958	0.0595602	0.0114594	4.0988	0.171117	0.292707	0.0438366	0.246572	0.110442	0.114246	0.38715	0.106888	1.03441	0.342763	1.29652	0.220113	1.89508	0.386189	0.00726681	3.00119	0.00224927	0.0189952
WS-1-6	756.056	3.85146	0.310641	0.891075	1.17765	9.40516	1.18754	2.15271	570.468	13.6996	0.0081311	0.0618339	0.0106745	4.02191	0.16515	0.297999	0.0420717	0.242618	0.116088	0.110721	0.388011	0.108376	1.05239	0.338935	1.25199	0.228698	1.84839	0.38247	0.00721526	2.91023	0.00267196	0.0185334
Mean	809.509	4.04887	0.386061	0.890305	1.21796	9.84338	1.27753	2.98202	597.94	13.3444	0.00948647	0.0765204	0.0115787	4.23688	0.17658	0.303415	0.0435564	0.241541	0.109785	0.110443	0.392067	0.104194	1.00919	0.327591	1.2633	0.222728	1.88866	0.400491	0.0068084	3.11865	0.00313385	0.0200055
2SD	136.896	0.323758	0.207154	0.0629223	0.097417	1.56772	0.210672	1.44632	43.2387	0.814358	0.00222485	0.0612863	0.00175758	0.402474	0.0139049	0.0153518	0.00307303	0.0126273	0.0166674	0.00533093	0.119578	0.00605328	0.0748399	0.0209802	0.09159	0.00677167	0.039968	0.0279907	0.00111726	0.305393	0.00135018	0.00266573
